# Supplementary material for: A 3p26-3p25 Genetic Linkage Finding for DSM-IV Major Depression in Heavy Smoking Families
Source: Atypon-hosted journal article supplement (doi:10.1176/appi.ajp.2011.10091319), 2011-05-16
Supplement: ajp_168_08_848_01.pdf [file ajp_168_08_848_01.pdf]

Supplementary Table 1. Families with affected-sib pairs (ASP) for Major Depressive Disorder in the Australian (AUS) and Finnish (FIN) NAG linkage samples

|                                                   | Australian<br>(N=91) | Finnish<br>(N=25) |
|---------------------------------------------------|----------------------|-------------------|
| Number of MDD ASP                                 | 187                  | 33                |
| Number of MDD Affected Offspring                  | 216                  | 54                |
| Number of MDD Unaffected Offspring                | 132                  | 63                |
| Number of parents genotyped (microsatellites)     | 120                  | 5                 |
| Mean Age of Offspring (years, standard deviation) | 40.2 (7.5)           | 56.1 (7.2)        |
| % Female                                          | 58.1                 | 51.3              |
