# Supplementary material for: A 3p26-3p25 Genetic Linkage Finding for DSM-IV Major Depression in Heavy Smoking Families
Source: Atypon-hosted journal article supplement (doi:10.1176/appi.ajp.2011.10091319), 2011-05-16
Supplement: ajp_168_08_848_01.pdf [file ajp_168_08_848_01.pdf]

 


Psychiatry Online
