# Supplementary material for: A 3p26-3p25 Genetic Linkage Finding for DSM-IV Major Depression in Heavy Smoking Families
Source: Atypon-hosted journal article supplement (doi:10.1176/appi.ajp.2011.10091319), 2011-05-16
Supplement: ajp_168_08_848_02.pdf [file ajp_168_08_848_02.pdf]

Supplementary Table 2 Single- and Multi-point non-parametric linkage findings (and marker positions) for major depressive disorder in the Australian NAG heavy smoking genomescan sample by chromosome

| Chromosome | Marker  | LOD_sp | POS(cM) | LOD_mp |
|------------|---------|--------|---------|--------|
| 1          | D1S468  | -0.21  | 4.000   | -0.32  |
| 1          | .       | .      | 6.000   | -0.28  |
| 1          | .       | .      | 8.000   | -0.21  |
| 1          | .       | .      | 10.000  | -0.14  |
| 1          | .       | .      | 12.000  | -0.08  |
| 1          | D1S214  | 0.00   | 12.054  | .      |
| 1          | .       | .      | 14.000  | -0.09  |
| 1          | .       | .      | 16.000  | -0.14  |
| 1          | D1S450  | -0.35  | 16.610  | .      |
| 1          | .       | .      | 18.000  | -0.14  |
| 1          | D1S2667 | -0.05  | 19.880  | .      |
| 1          | .       | .      | 20.000  | -0.11  |
| 1          | .       | .      | 22.000  | -0.10  |
| 1          | .       | .      | 24.000  | -0.08  |
| 1          | .       | .      | 26.000  | -0.05  |
| 1          | .       | .      | 28.000  | -0.03  |
| 1          | D1S2697 | 0.08   | 29.253  | .      |
| 1          | .       | .      | 30.000  | 0.00   |
| 1          | .       | .      | 32.000  | 0.01   |
| 1          | .       | .      | 34.000  | 0.05   |
| 1          | .       | .      | 36.000  | 0.12   |
| 1          | D1S199  | 0.39   | 37.480  | .      |
| 1          | .       | .      | 38.000  | 0.20   |
| 1          | .       | .      | 40.000  | 0.33   |
| 1          | .       | .      | 42.000  | 0.52   |
| 1          | .       | .      | 44.000  | 0.77   |
| 1          | D1S234  | 0.58   | 44.490  | .      |
| 1          | .       | .      | 46.000  | 0.87   |
| 1          | .       | .      | 48.000  | 0.88   |
| 1          | .       | .      | 50.000  | 0.86   |
| 1          | .       | .      | 52.000  | 0.78   |
| 1          | .       | .      | 54.000  | 0.67   |
| 1          | .       | .      | 56.000  | 0.54   |
| 1          | .       | .      | 58.000  | 0.39   |
| 1          | D1S255  | 0.28   | 58.660  | .      |
| 1          | .       | .      | 60.000  | 0.34   |
| 1          | .       | .      | 62.000  | 0.32   |
| 1          | .       | .      | 64.000  | 0.29   |
| 1          | .       | .      | 66.000  | 0.25   |
| 1          | .       | .      | 68.000  | 0.21   |
| 1          | D1S2797 | 0.23   | 68.900  | .      |
| 1          | .       | .      | 70.000  | 0.20   |
| 1          | .       | .      | 72.000  | 0.20   |
| 1          | .       | .      | 74.000  | 0.19   |
| 1          | .       | .      | 76.000  | 0.18   |

LOD\_sp: single-point linkage LOD score

LOD\_mp: multi-point linkage LOD score

Supplementary Table 2 Single- and Multi-point non-parametric linkage findings (and marker positions) for major depressive disorder in the Australian NAG heavy smoking genomescan sample by chromosome

| Chromosome | Marker  | LOD_sp | POS(cM) | LOD_mp |
|------------|---------|--------|---------|--------|
| 1          |         | .      | 78.000  | 0.17   |
| 1          |         | .      | 80.000  | 0.15   |
| 1          | D1S2890 | 0.30   | 80.900  | .      |
| 1          |         | .      | 82.000  | 0.11   |
| 1          |         | .      | 84.000  | 0.04   |
| 1          |         | .      | 86.000  | 0.00   |
| 1          |         | .      | 88.000  | -0.01  |
| 1          | D1S230  | -0.03  | 88.120  | .      |
| 1          |         | .      | 90.000  | -0.01  |
| 1          |         | .      | 92.000  | -0.01  |
| 1          |         | .      | 94.000  | 0.00   |
| 1          |         | .      | 96.000  | 0.00   |
| 1          |         | .      | 98.000  | 0.00   |
| 1          |         | .      | 100.000 | 0.00   |
| 1          |         | .      | 102.000 | 0.01   |
| 1          | D1S2841 | 0.06   | 103.820 | .      |
| 1          |         | .      | 104.000 | 0.01   |
| 1          |         | .      | 106.000 | 0.00   |
| 1          | D1S207  | 0.00   | 107.160 | .      |
| 1          |         | .      | 108.000 | -0.01  |
| 1          |         | .      | 110.000 | 0.00   |
| 1          |         | .      | 112.000 | 0.00   |
| 1          |         | .      | 114.000 | 0.00   |
| 1          |         | .      | 116.000 | 0.00   |
| 1          | D1S2868 | 0.00   | 116.640 | .      |
| 1          |         | .      | 118.000 | 0.00   |
| 1          |         | .      | 120.000 | -0.01  |
| 1          |         | .      | 122.000 | -0.01  |
| 1          | D1S206  | -0.01  | 122.640 | .      |
| 1          |         | .      | 124.000 | -0.01  |
| 1          |         | .      | 126.000 | 0.00   |
| 1          |         | .      | 128.000 | 0.00   |
| 1          |         | .      | 130.000 | 0.00   |
| 1          |         | .      | 132.000 | 0.00   |
| 1          | D1S2726 | 0.02   | 132.110 | .      |
| 1          |         | .      | 134.000 | 0.00   |
| 1          |         | .      | 136.000 | 0.00   |
| 1          |         | .      | 138.000 | 0.00   |
| 1          | D1S252  | -0.10  | 139.160 | .      |
| 1          |         | .      | 140.000 | 0.00   |
| 1          |         | .      | 142.000 | 0.00   |
| 1          |         | .      | 144.000 | 0.02   |
| 1          | D1S498  | -0.02  | 144.940 | .      |
| 1          |         | .      | 146.000 | 0.04   |
| 1          |         | .      | 148.000 | 0.06   |

LOD\_sp: single-point linkage LOD score

LOD\_mp: multi-point linkage LOD score

Supplementary Table 2 Single- and Multi-point non-parametric linkage findings (and marker positions) for major depressive disorder in the Australian NAG heavy smoking genomescan sample by chromosome

| Chromosome | Marker  | LOD_sp | POS(cM) | LOD_mp |
|------------|---------|--------|---------|--------|
| 1          |         | .      | 150.000 | 0.09   |
| 1          |         | .      | 152.000 | 0.12   |
| 1          |         | .      | 154.000 | 0.17   |
| 1          |         | .      | 156.000 | 0.22   |
| 1          | D1S484  | 0.29   | 157.510 | .      |
| 1          |         | .      | 158.000 | 0.28   |
| 1          |         | .      | 160.000 | 0.37   |
| 1          |         | .      | 162.000 | 0.44   |
| 1          |         | .      | 164.000 | 0.48   |
| 1          | D1S2878 | 0.77   | 165.780 | .      |
| 1          |         | .      | 166.000 | 0.50   |
| 1          |         | .      | 168.000 | 0.53   |
| 1          | D1S196  | 0.67   | 169.400 | .      |
| 1          |         | .      | 170.000 | 0.53   |
| 1          |         | .      | 172.000 | 0.58   |
| 1          |         | .      | 174.000 | 0.58   |
| 1          |         | .      | 176.000 | 0.54   |
| 1          | D1S218  | 0.19   | 176.300 | .      |
| 1          |         | .      | 178.000 | 0.62   |
| 1          |         | .      | 180.000 | 0.71   |
| 1          |         | .      | 182.000 | 0.78   |
| 1          |         | .      | 184.000 | 0.81   |
| 1          |         | .      | 186.000 | 0.80   |
| 1          |         | .      | 188.000 | 0.77   |
| 1          | D1S238  | 0.23   | 188.550 | .      |
| 1          |         | .      | 190.000 | 0.75   |
| 1          |         | .      | 192.000 | 0.71   |
| 1          |         | .      | 194.000 | 0.63   |
| 1          | D1S413  | 0.92   | 194.980 | .      |
| 1          |         | .      | 196.000 | 0.54   |
| 1          |         | .      | 198.000 | 0.44   |
| 1          |         | .      | 200.000 | 0.32   |
| 1          |         | .      | 202.000 | 0.21   |
| 1          |         | .      | 204.000 | 0.11   |
| 1          |         | .      | 206.000 | 0.05   |
| 1          | D1S249  | 0.05   | 207.070 | .      |
| 1          |         | .      | 208.000 | 0.03   |
| 1          |         | .      | 210.000 | 0.05   |
| 1          |         | .      | 212.000 | 0.07   |
| 1          |         | .      | 214.000 | 0.08   |
| 1          | D1S425  | -0.01  | 215.070 | .      |
| 1          |         | .      | 216.000 | 0.09   |
| 1          |         | .      | 218.000 | 0.13   |
| 1          |         | .      | 220.000 | 0.17   |
| 1          |         | .      | 222.000 | 0.20   |

LOD\_sp: single-point linkage LOD score

LOD\_mp: multi-point linkage LOD score

Supplementary Table 2 Single- and Multi-point non-parametric linkage findings (and marker positions) for major depressive disorder in the Australian NAG heavy smoking genomescan sample by chromosome

| Chromosome | Marker  | LOD_sp | POS(cM) | LOD_mp |
|------------|---------|--------|---------|--------|
| 1          | .       | .      | 224.000 | 0.21   |
| 1          | .       | .      | 226.000 | 0.21   |
| 1          | .       | .      | 228.000 | 0.19   |
| 1          | D1S213  | 0.14   | 228.260 | .      |
| 1          | .       | .      | 230.000 | 0.23   |
| 1          | .       | .      | 232.000 | 0.29   |
| 1          | .       | .      | 234.000 | 0.35   |
| 1          | .       | .      | 236.000 | 0.43   |
| 1          | .       | .      | 238.000 | 0.51   |
| 1          | .       | .      | 240.000 | 0.58   |
| 1          | D1S2800 | 0.79   | 240.769 | .      |
| 1          | .       | .      | 242.000 | 0.62   |
| 1          | .       | .      | 244.000 | 0.64   |
| 1          | .       | .      | 246.000 | 0.64   |
| 1          | .       | .      | 248.000 | 0.64   |
| 1          | .       | .      | 250.000 | 0.62   |
| 1          | .       | .      | 252.000 | 0.59   |
| 1          | .       | .      | 254.000 | 0.56   |
| 1          | .       | .      | 256.000 | 0.52   |
| 1          | D1S2785 | 0.49   | 257.460 | .      |
| 1          | .       | .      | 258.000 | 0.50   |
| 1          | .       | .      | 260.000 | 0.48   |
| 1          | D1S2842 | 0.14   | 261.860 | .      |
| 1          | .       | .      | 262.000 | 0.42   |
| 1          | .       | .      | 264.000 | 0.53   |
| 1          | .       | .      | 266.000 | 0.64   |
| 1          | .       | .      | 268.000 | 0.76   |
| 1          | .       | .      | 270.000 | 0.87   |
| 1          | D1S2836 | 0.96   | 271.840 | .      |
| 1          | .       | .      | 272.000 | 0.96   |
| 2          | D2S319  | -0.54  | 7.600   | -0.83  |
| 2          | .       | .      | 9.600   | -0.84  |
| 2          | .       | .      | 11.600  | -0.85  |
| 2          | .       | .      | 13.600  | -0.86  |
| 2          | .       | .      | 15.600  | -0.86  |
| 2          | .       | .      | 17.600  | -0.87  |
| 2          | D2S2211 | -0.82  | 17.732  | .      |
| 2          | .       | .      | 19.600  | -0.71  |
| 2          | .       | .      | 21.600  | -0.50  |
| 2          | D2S162  | -0.43  | 22.730  | .      |
| 2          | .       | .      | 23.600  | -0.39  |
| 2          | .       | .      | 25.600  | -0.45  |
| 2          | .       | .      | 27.600  | -0.49  |
| 2          | D2S168  | -0.56  | 28.920  | .      |
| 2          | .       | .      | 29.600  | -0.48  |

LOD\_sp: single-point linkage LOD score

LOD\_mp: multi-point linkage LOD score

Supplementary Table 2 Single- and Multi-point non-parametric linkage findings (and marker positions) for major depressive disorder in the Australian NAG heavy smoking genomescan sample by chromosome

| Chromosome | Marker  | LOD_sp | POS(cM) | LOD_mp |
|------------|---------|--------|---------|--------|
| 2          | .       | .      | 31.600  | -0.41  |
| 2          | .       | .      | 33.600  | -0.32  |
| 2          | .       | .      | 35.600  | -0.23  |
| 2          | .       | .      | 37.600  | -0.14  |
| 2          | .       | .      | 39.600  | -0.07  |
| 2          | D2S305  | -0.02  | 41.334  | .      |
| 2          | .       | .      | 41.600  | -0.03  |
| 2          | .       | .      | 43.600  | -0.02  |
| 2          | .       | .      | 45.600  | -0.01  |
| 2          | .       | .      | 47.600  | 0.00   |
| 2          | .       | .      | 49.600  | 0.00   |
| 2          | D2S165  | -0.06  | 50.916  | .      |
| 2          | .       | .      | 51.600  | 0.00   |
| 2          | .       | .      | 53.600  | -0.02  |
| 2          | .       | .      | 55.600  | -0.04  |
| 2          | .       | .      | 57.600  | -0.04  |
| 2          | D2S367  | -0.01  | 57.890  | .      |
| 2          | .       | .      | 59.600  | -0.04  |
| 2          | .       | .      | 61.600  | -0.04  |
| 2          | .       | .      | 63.600  | -0.04  |
| 2          | .       | .      | 65.600  | -0.03  |
| 2          | D2S2259 | 0.02   | 67.060  | .      |
| 2          | .       | .      | 67.600  | -0.01  |
| 2          | .       | .      | 69.600  | 0.00   |
| 2          | .       | .      | 71.600  | 0.02   |
| 2          | D2S391  | 0.11   | 72.330  | .      |
| 2          | .       | .      | 73.600  | 0.04   |
| 2          | .       | .      | 75.600  | 0.05   |
| 2          | .       | .      | 77.600  | 0.07   |
| 2          | .       | .      | 79.600  | 0.10   |
| 2          | .       | .      | 81.600  | 0.12   |
| 2          | .       | .      | 83.600  | 0.14   |
| 2          | D2S337  | 0.16   | 83.980  | .      |
| 2          | .       | .      | 85.600  | 0.21   |
| 2          | .       | .      | 87.600  | 0.29   |
| 2          | D2S2368 | 0.03   | 89.240  | .      |
| 2          | .       | .      | 89.600  | 0.34   |
| 2          | .       | .      | 91.600  | 0.36   |
| 2          | .       | .      | 93.600  | 0.37   |
| 2          | .       | .      | 95.600  | 0.37   |
| 2          | .       | .      | 97.600  | 0.34   |
| 2          | .       | .      | 99.600  | 0.30   |
| 2          | D2S286  | 0.49   | 99.990  | .      |
| 2          | .       | .      | 101.600 | 0.20   |
| 2          | .       | .      | 103.600 | 0.10   |

LOD\_sp: single-point linkage LOD score

LOD\_mp: multi-point linkage LOD score

Supplementary Table 2 Single- and Multi-point non-parametric linkage findings (and marker positions) for major depressive disorder in the Australian NAG heavy smoking genomescan sample by chromosome

| Chromosome | Marker  | LOD_sp | POS(cM) | LOD_mp |
|------------|---------|--------|---------|--------|
| 2          | .       | .      | 105.600 | 0.03   |
| 2          | .       | .      | 107.600 | 0.00   |
| 2          | D2S2333 | 0.00   | 108.810 | .      |
| 2          | .       | .      | 109.600 | 0.00   |
| 2          | D2S2216 | 0.02   | 111.480 | .      |
| 2          | .       | .      | 111.600 | 0.00   |
| 2          | .       | .      | 113.600 | 0.00   |
| 2          | .       | .      | 115.600 | 0.00   |
| 2          | .       | .      | 117.600 | 0.00   |
| 2          | .       | .      | 119.600 | 0.00   |
| 2          | .       | .      | 121.600 | -0.01  |
| 2          | .       | .      | 123.600 | -0.01  |
| 2          | D2S160  | 0.00   | 124.940 | .      |
| 2          | .       | .      | 125.600 | -0.04  |
| 2          | .       | .      | 127.600 | -0.13  |
| 2          | .       | .      | 129.600 | -0.28  |
| 2          | .       | .      | 131.600 | -0.43  |
| 2          | .       | .      | 133.600 | -0.58  |
| 2          | D2S347  | -0.68  | 135.310 | .      |
| 2          | .       | .      | 135.600 | -0.70  |
| 2          | .       | .      | 137.600 | -0.69  |
| 2          | .       | .      | 139.600 | -0.68  |
| 2          | .       | .      | 141.600 | -0.66  |
| 2          | .       | .      | 143.600 | -0.63  |
| 2          | .       | .      | 145.600 | -0.60  |
| 2          | D2S112  | -0.14  | 145.710 | .      |
| 2          | .       | .      | 147.600 | -0.50  |
| 2          | .       | .      | 149.600 | -0.40  |
| 2          | .       | .      | 151.600 | -0.28  |
| 2          | .       | .      | 153.600 | -0.16  |
| 2          | .       | .      | 155.600 | -0.07  |
| 2          | D2S151  | 0.00   | 157.500 | .      |
| 2          | .       | .      | 157.600 | -0.02  |
| 2          | .       | .      | 159.600 | 0.01   |
| 2          | .       | .      | 161.600 | 0.15   |
| 2          | .       | .      | 163.600 | 0.42   |
| 2          | D2S142  | 0.47   | 165.190 | .      |
| 2          | .       | .      | 165.600 | 0.68   |
| 2          | .       | .      | 167.600 | 0.64   |
| 2          | .       | .      | 169.600 | 0.51   |
| 2          | D2S2330 | 0.11   | 171.100 | .      |
| 2          | .       | .      | 171.600 | 0.40   |
| 2          | .       | .      | 173.600 | 0.38   |
| 2          | .       | .      | 175.600 | 0.34   |
| 2          | .       | .      | 177.600 | 0.28   |

LOD\_sp: single-point linkage LOD score

LOD\_mp: multi-point linkage LOD score

Supplementary Table 2 Single- and Multi-point non-parametric linkage findings (and marker positions) for major depressive disorder in the Australian NAG heavy smoking genomescan sample by chromosome

| Chromosome | Marker  | LOD_sp | POS(cM) | LOD_mp |
|------------|---------|--------|---------|--------|
| 2          | D2S335  | 0.07   | 177.980 | .      |
| 2          | .       | .      | 179.600 | 0.27   |
| 2          | .       | .      | 181.600 | 0.25   |
| 2          | .       | .      | 183.600 | 0.21   |
| 2          | .       | .      | 185.600 | 0.16   |
| 2          | .       | .      | 187.600 | 0.11   |
| 2          | D2S364  | 0.07   | 187.670 | .      |
| 2          | .       | .      | 189.600 | 0.06   |
| 2          | .       | .      | 191.600 | 0.01   |
| 2          | .       | .      | 193.600 | 0.00   |
| 2          | D2S117  | -0.02  | 194.630 | .      |
| 2          | .       | .      | 195.600 | -0.03  |
| 2          | .       | .      | 197.600 | -0.06  |
| 2          | .       | .      | 199.600 | -0.08  |
| 2          | .       | .      | 201.600 | -0.10  |
| 2          | .       | .      | 203.600 | -0.10  |
| 2          | D2S325  | -0.06  | 204.880 | .      |
| 2          | .       | .      | 205.600 | -0.08  |
| 2          | .       | .      | 207.600 | -0.04  |
| 2          | .       | .      | 209.600 | -0.01  |
| 2          | .       | .      | 211.600 | 0.00   |
| 2          | .       | .      | 213.600 | 0.00   |
| 2          | D2S2382 | 0.10   | 213.820 | .      |
| 2          | .       | .      | 215.600 | 0.00   |
| 2          | .       | .      | 217.600 | 0.00   |
| 2          | .       | .      | 219.600 | 0.01   |
| 2          | .       | .      | 221.600 | 0.01   |
| 2          | D2S126  | 0.04   | 223.350 | .      |
| 2          | .       | .      | 223.600 | 0.01   |
| 2          | .       | .      | 225.600 | 0.01   |
| 2          | .       | .      | 227.600 | 0.01   |
| 2          | .       | .      | 229.600 | 0.02   |
| 2          | .       | .      | 231.600 | 0.02   |
| 2          | .       | .      | 233.600 | 0.03   |
| 2          | D2S396  | 0.30   | 235.363 | .      |
| 2          | .       | .      | 235.600 | 0.03   |
| 2          | .       | .      | 237.600 | 0.00   |
| 2          | .       | .      | 239.600 | -0.02  |
| 2          | D2S206  | -0.17  | 240.030 | .      |
| 2          | .       | .      | 241.600 | -0.04  |
| 2          | .       | .      | 243.600 | -0.04  |
| 2          | .       | .      | 245.600 | -0.04  |
| 2          | .       | .      | 247.600 | -0.03  |
| 2          | D2S338  | -0.01  | 248.370 | .      |
| 2          | .       | .      | 249.600 | -0.04  |

LOD\_sp: single-point linkage LOD score

LOD\_mp: multi-point linkage LOD score

Supplementary Table 2 Single- and Multi-point non-parametric linkage findings (and marker positions) for major depressive disorder in the Australian NAG heavy smoking genomescan sample by chromosome

| Chromosome | Marker  | LOD_sp | POS(cM) | LOD_mp |
|------------|---------|--------|---------|--------|
| 2          | .       | .      | 251.600 | -0.06  |
| 2          | .       | .      | 253.600 | -0.08  |
| 2          | .       | .      | 255.600 | -0.11  |
| 2          | .       | .      | 257.600 | -0.12  |
| 2          | D2S125  | -0.30  | 258.190 | .      |
| 2          | .       | .      | 259.600 | -0.12  |
| 3          | D3S1297 | 0.59   | 4.888   | 0.68   |
| 3          | .       | .      | 6.888   | 1.03   |
| 3          | .       | .      | 8.888   | 1.47   |
| 3          | .       | .      | 10.888  | 1.97   |
| 3          | .       | .      | 12.888  | 2.47   |
| 3          | .       | .      | 14.888  | 2.92   |
| 3          | .       | .      | 16.888  | 3.28   |
| 3          | .       | .      | 18.888  | 3.53   |
| 3          | D3S1304 | 3.73   | 19.610  | .      |
| 3          | .       | .      | 20.888  | 3.85   |
| 3          | .       | .      | 22.888  | 4.09   |
| 3          | .       | .      | 24.888  | 4.14   |
| 3          | .       | .      | 26.888  | 4.00   |
| 3          | .       | .      | 28.888  | 3.72   |
| 3          | D3S1263 | 2.93   | 29.620  | .      |
| 3          | .       | .      | 30.888  | 3.31   |
| 3          | .       | .      | 32.888  | 2.83   |
| 3          | .       | .      | 34.888  | 2.31   |
| 3          | .       | .      | 36.888  | 1.78   |
| 3          | D3S2338 | 0.75   | 37.490  | .      |
| 3          | .       | .      | 38.888  | 1.53   |
| 3          | .       | .      | 40.888  | 1.33   |
| 3          | .       | .      | 42.888  | 1.07   |
| 3          | .       | .      | 44.888  | 0.78   |
| 3          | .       | .      | 46.888  | 0.49   |
| 3          | .       | .      | 48.888  | 0.25   |
| 3          | D3S1266 | 0.02   | 50.530  | .      |
| 3          | .       | .      | 50.888  | 0.11   |
| 3          | .       | .      | 52.888  | 0.10   |
| 3          | .       | .      | 54.888  | 0.07   |
| 3          | .       | .      | 56.888  | 0.05   |
| 3          | .       | .      | 58.888  | 0.02   |
| 3          | D3S1277 | 0.04   | 60.074  | .      |
| 3          | .       | .      | 60.888  | 0.01   |
| 3          | .       | .      | 62.888  | 0.01   |
| 3          | .       | .      | 64.888  | 0.00   |
| 3          | .       | .      | 66.888  | 0.00   |
| 3          | .       | .      | 68.888  | 0.00   |
| 3          | .       | .      | 70.888  | 0.00   |

LOD\_sp: single-point linkage LOD score

LOD\_mp: multi-point linkage LOD score



Supplementary Table 2 Single- and Multi-point non-parametric linkage findings (and marker positions) for major depressive disorder in the Australian NAG heavy smoking genomescan sample by chromosome

| Chromosome | Marker  | LOD_sp | POS(cM) | LOD_mp |
|------------|---------|--------|---------|--------|
| 3          |         | .      | 72.888  | 0.00   |
| 3          | D3S1289 | 0.01   | 73.730  | .      |
| 3          |         | .      | 74.888  | 0.00   |
| 3          |         | .      | 76.888  | 0.00   |
| 3          |         | .      | 78.888  | 0.00   |
| 3          |         | .      | 80.888  | -0.01  |
| 3          | D3S1300 | 0.04   | 82.220  | .      |
| 3          |         | .      | 82.888  | -0.01  |
| 3          |         | .      | 84.888  | -0.04  |
| 3          |         | .      | 86.888  | -0.07  |
| 3          |         | .      | 88.888  | -0.11  |
| 3          | D3S1285 | -0.26  | 89.280  | .      |
| 3          |         | .      | 90.888  | -0.23  |
| 3          |         | .      | 92.888  | -0.42  |
| 3          | D3S1566 | -0.59  | 94.760  | .      |
| 3          |         | .      | 94.888  | -0.58  |
| 3          |         | .      | 96.888  | -0.52  |
| 3          |         | .      | 98.888  | -0.45  |
| 3          |         | .      | 100.888 | -0.36  |
| 3          |         | .      | 102.888 | -0.26  |
| 3          |         | .      | 104.888 | -0.16  |
| 3          |         | .      | 106.888 | -0.09  |
| 3          | D3S3681 | -0.08  | 107.430 | .      |
| 3          |         | .      | 108.888 | -0.06  |
| 3          |         | .      | 110.888 | -0.06  |
| 3          | D3S1271 | -0.22  | 112.280 | .      |
| 3          |         | .      | 112.888 | -0.07  |
| 3          |         | .      | 114.888 | -0.07  |
| 3          |         | .      | 116.888 | -0.05  |
| 3          |         | .      | 118.888 | -0.03  |
| 3          |         | .      | 120.888 | -0.01  |
| 3          | D3S1278 | -0.01  | 122.740 | .      |
| 3          |         | .      | 122.888 | 0.00   |
| 3          |         | .      | 124.888 | -0.01  |
| 3          |         | .      | 126.888 | -0.02  |
| 3          |         | .      | 128.888 | -0.02  |
| 3          | D3S1267 | -0.01  | 130.304 | .      |
| 3          |         | .      | 130.888 | -0.02  |
| 3          |         | .      | 132.888 | -0.01  |
| 3          |         | .      | 134.888 | 0.00   |
| 3          |         | .      | 136.888 | 0.00   |
| 3          | D3S1292 | 0.00   | 138.820 | .      |
| 3          |         | .      | 138.888 | 0.01   |
| 3          |         | .      | 140.888 | 0.02   |
| 3          |         | .      | 142.888 | 0.06   |

LOD\_sp: single-point linkage LOD score  
LOD\_mp: multi-point linkage LOD score

Supplementary Table 2 Single- and Multi-point non-parametric linkage findings (and marker positions) for major depressive disorder in the Australian NAG heavy smoking genomescan sample by chromosome

| Chromosome | Marker  | LOD_sp | POS(cM) | LOD_mp |
|------------|---------|--------|---------|--------|
| 3          | .       | .      | 144.888 | 0.12   |
| 3          | .       | .      | 146.888 | 0.20   |
| 3          | .       | .      | 148.888 | 0.29   |
| 3          | D3S1569 | 0.09   | 150.580 | .      |
| 3          | .       | .      | 150.888 | 0.36   |
| 3          | .       | .      | 152.888 | 0.25   |
| 3          | .       | .      | 154.888 | 0.15   |
| 3          | .       | .      | 156.888 | 0.06   |
| 3          | .       | .      | 158.888 | 0.02   |
| 3          | D3S1279 | 0.01   | 160.190 | .      |
| 3          | .       | .      | 160.888 | 0.00   |
| 3          | .       | .      | 162.888 | 0.00   |
| 3          | .       | .      | 164.888 | -0.02  |
| 3          | .       | .      | 166.888 | -0.04  |
| 3          | .       | .      | 168.888 | -0.06  |
| 3          | D3S1614 | -0.41  | 169.980 | .      |
| 3          | .       | .      | 170.888 | -0.06  |
| 3          | .       | .      | 172.888 | -0.04  |
| 3          | .       | .      | 174.888 | -0.01  |
| 3          | .       | .      | 176.888 | 0.00   |
| 3          | D3S1565 | -0.02  | 177.940 | .      |
| 3          | .       | .      | 178.888 | 0.02   |
| 3          | .       | .      | 180.888 | 0.04   |
| 3          | .       | .      | 182.888 | 0.07   |
| 3          | .       | .      | 184.888 | 0.12   |
| 3          | .       | .      | 186.888 | 0.17   |
| 3          | .       | .      | 188.888 | 0.22   |
| 3          | .       | .      | 190.888 | 0.28   |
| 3          | .       | .      | 192.888 | 0.32   |
| 3          | D3S1262 | 0.65   | 194.330 | .      |
| 3          | .       | .      | 194.888 | 0.36   |
| 3          | .       | .      | 196.888 | 0.41   |
| 3          | .       | .      | 198.888 | 0.44   |
| 3          | .       | .      | 200.888 | 0.45   |
| 3          | D3S1580 | 0.48   | 202.000 | .      |
| 3          | .       | .      | 202.888 | 0.53   |
| 3          | .       | .      | 204.888 | 0.72   |
| 3          | .       | .      | 206.888 | 0.87   |
| 3          | D3S1601 | 1.39   | 208.140 | .      |
| 3          | .       | .      | 208.888 | 0.90   |
| 3          | .       | .      | 210.888 | 0.75   |
| 3          | .       | .      | 212.888 | 0.56   |
| 3          | .       | .      | 214.888 | 0.36   |
| 3          | .       | .      | 216.888 | 0.18   |
| 3          | .       | .      | 218.888 | 0.06   |

LOD\_sp: single-point linkage LOD score

LOD\_mp: multi-point linkage LOD score

Supplementary Table 2 Single- and Multi-point non-parametric linkage findings (and marker positions) for major depressive disorder in the Australian NAG heavy smoking genomescan sample by chromosome

| Chromosome | Marker  | LOD_sp | POS(cM) | LOD_mp |
|------------|---------|--------|---------|--------|
| 3          | D3S1311 | 0.00   | 220.190 | .      |
| 3          | .       | .      | 220.888 | 0.01   |
| 4          | D4S412  | 0.03   | 4.420   | 0.00   |
| 4          | .       | .      | 6.420   | -0.01  |
| 4          | .       | .      | 8.420   | -0.03  |
| 4          | .       | .      | 10.420  | -0.07  |
| 4          | .       | .      | 12.420  | -0.12  |
| 4          | D4S2935 | -0.07  | 12.849  | .      |
| 4          | .       | .      | 14.420  | -0.17  |
| 4          | .       | .      | 16.420  | -0.22  |
| 4          | .       | .      | 18.420  | -0.26  |
| 4          | .       | .      | 20.420  | -0.30  |
| 4          | .       | .      | 22.420  | -0.34  |
| 4          | .       | .      | 24.420  | -0.37  |
| 4          | .       | .      | 26.420  | -0.39  |
| 4          | D4S403  | -0.12  | 26.710  | .      |
| 4          | .       | .      | 28.420  | -0.41  |
| 4          | .       | .      | 30.420  | -0.43  |
| 4          | .       | .      | 32.420  | -0.44  |
| 4          | .       | .      | 34.420  | -0.46  |
| 4          | D4S419  | -0.17  | 34.970  | .      |
| 4          | .       | .      | 36.420  | -0.43  |
| 4          | .       | .      | 38.420  | -0.37  |
| 4          | .       | .      | 40.420  | -0.29  |
| 4          | .       | .      | 42.420  | -0.21  |
| 4          | .       | .      | 44.420  | -0.12  |
| 4          | .       | .      | 46.420  | -0.06  |
| 4          | D4S391  | -0.09  | 47.330  | .      |
| 4          | .       | .      | 48.420  | -0.03  |
| 4          | .       | .      | 50.420  | -0.03  |
| 4          | .       | .      | 52.420  | -0.02  |
| 4          | .       | .      | 54.420  | -0.01  |
| 4          | .       | .      | 56.420  | -0.01  |
| 4          | .       | .      | 58.420  | 0.00   |
| 4          | D4S405  | -0.02  | 60.230  | .      |
| 4          | .       | .      | 60.420  | 0.00   |
| 4          | .       | .      | 62.420  | 0.00   |
| 4          | .       | .      | 64.420  | 0.00   |
| 4          | .       | .      | 66.420  | 0.01   |
| 4          | .       | .      | 68.420  | 0.02   |
| 4          | .       | .      | 70.420  | 0.02   |
| 4          | .       | .      | 72.420  | 0.03   |
| 4          | D4S1592 | -0.03  | 72.710  | .      |
| 4          | .       | .      | 74.420  | 0.06   |
| 4          | .       | .      | 76.420  | 0.07   |

LOD\_sp: single-point linkage LOD score

LOD\_mp: multi-point linkage LOD score

Supplementary Table 2 Single- and Multi-point non-parametric linkage findings (and marker positions) for major depressive disorder in the Australian NAG heavy smoking genomescan sample by chromosome

| Chromosome | Marker  | LOD_sp | POS(cM) | LOD_mp |
|------------|---------|--------|---------|--------|
| 4          |         | .      | 78.420  | 0.06   |
| 4          | D4S392  | 0.00   | 80.380  | .      |
| 4          |         | .      | 80.420  | 0.03   |
| 4          |         | .      | 82.420  | 0.03   |
| 4          |         | .      | 84.420  | 0.02   |
| 4          |         | .      | 86.420  | 0.01   |
| 4          |         | .      | 88.420  | 0.01   |
| 4          | D4S2964 | -0.18  | 88.450  | .      |
| 4          |         | .      | 90.420  | 0.01   |
| 4          |         | .      | 92.420  | 0.02   |
| 4          | D4S1534 | -0.01  | 93.190  | .      |
| 4          |         | .      | 94.420  | 0.03   |
| 4          |         | .      | 96.420  | 0.05   |
| 4          |         | .      | 98.420  | 0.06   |
| 4          | D4S414  | 0.00   | 100.160 | .      |
| 4          |         | .      | 100.420 | 0.06   |
| 4          |         | .      | 102.420 | 0.03   |
| 4          |         | .      | 104.420 | 0.01   |
| 4          |         | .      | 106.420 | 0.00   |
| 4          | D4S1572 | -0.09  | 107.520 | .      |
| 4          |         | .      | 108.420 | 0.00   |
| 4          |         | .      | 110.420 | 0.00   |
| 4          |         | .      | 112.420 | 0.00   |
| 4          |         | .      | 114.420 | 0.00   |
| 4          | D4S406  | 0.01   | 114.740 | .      |
| 4          |         | .      | 116.420 | 0.00   |
| 4          |         | .      | 118.420 | 0.01   |
| 4          |         | .      | 120.420 | 0.04   |
| 4          | D4S402  | 0.09   | 122.100 | .      |
| 4          |         | .      | 122.420 | 0.06   |
| 4          |         | .      | 124.420 | 0.01   |
| 4          |         | .      | 126.420 | -0.01  |
| 4          |         | .      | 128.420 | -0.08  |
| 4          |         | .      | 130.420 | -0.22  |
| 4          | D4S1575 | -0.05  | 131.590 | .      |
| 4          |         | .      | 132.420 | -0.36  |
| 4          |         | .      | 134.420 | -0.46  |
| 4          |         | .      | 136.420 | -0.54  |
| 4          |         | .      | 138.420 | -0.62  |
| 4          | D4S424  | -0.76  | 138.870 | .      |
| 4          |         | .      | 140.420 | -0.67  |
| 4          |         | .      | 142.420 | -0.71  |
| 4          |         | .      | 144.420 | -0.74  |
| 4          |         | .      | 146.420 | -0.77  |
| 4          |         | .      | 148.420 | -0.78  |

LOD\_sp: single-point linkage LOD score

LOD\_mp: multi-point linkage LOD score

Supplementary Table 2 Single- and Multi-point non-parametric linkage findings (and marker positions) for major depressive disorder in the Australian NAG heavy smoking genomescan sample by chromosome

| Chromosome | Marker  | LOD_sp | POS(cM) | LOD_mp |
|------------|---------|--------|---------|--------|
| 4          | .       | .      | 150.420 | -0.79  |
| 4          | D4S413  | -0.76  | 152.243 | .      |
| 4          | .       | .      | 152.420 | -0.80  |
| 4          | .       | .      | 154.420 | -0.84  |
| 4          | .       | .      | 156.420 | -0.88  |
| 4          | .       | .      | 158.420 | -0.90  |
| 4          | .       | .      | 160.420 | -0.92  |
| 4          | .       | .      | 162.420 | -0.92  |
| 4          | D4S1597 | -0.59  | 163.650 | .      |
| 4          | .       | .      | 164.420 | -0.92  |
| 4          | .       | .      | 166.420 | -0.91  |
| 4          | .       | .      | 168.420 | -0.88  |
| 4          | D4S1539 | -0.41  | 170.010 | .      |
| 4          | .       | .      | 170.420 | -0.83  |
| 4          | .       | .      | 172.420 | -0.77  |
| 4          | D4S415  | -0.29  | 173.240 | .      |
| 4          | .       | .      | 174.420 | -0.74  |
| 4          | .       | .      | 176.420 | -0.72  |
| 4          | .       | .      | 178.420 | -0.69  |
| 4          | .       | .      | 180.420 | -0.67  |
| 4          | .       | .      | 182.420 | -0.64  |
| 4          | .       | .      | 184.420 | -0.60  |
| 4          | .       | .      | 186.420 | -0.56  |
| 4          | .       | .      | 188.420 | -0.52  |
| 4          | D4S1535 | -0.50  | 189.380 | .      |
| 4          | .       | .      | 190.420 | -0.47  |
| 4          | .       | .      | 192.420 | -0.43  |
| 4          | .       | .      | 194.420 | -0.38  |
| 4          | .       | .      | 196.420 | -0.33  |
| 4          | .       | .      | 198.420 | -0.28  |
| 4          | .       | .      | 200.420 | -0.22  |
| 4          | .       | .      | 202.420 | -0.17  |
| 4          | D4S426  | -0.01  | 202.690 | .      |
| 4          | .       | .      | 204.420 | -0.16  |
| 5          | D5S1981 | 0.00   | 1.190   | 0.01   |
| 5          | .       | .      | 3.190   | 0.00   |
| 5          | .       | .      | 5.190   | -0.02  |
| 5          | .       | .      | 7.190   | -0.07  |
| 5          | .       | .      | 9.190   | -0.12  |
| 5          | .       | .      | 11.190  | -0.18  |
| 5          | D5S406  | -0.35  | 12.360  | .      |
| 5          | .       | .      | 13.190  | -0.23  |
| 5          | .       | .      | 15.190  | -0.28  |
| 5          | .       | .      | 17.190  | -0.31  |
| 5          | .       | .      | 19.190  | -0.33  |

LOD\_sp: single-point linkage LOD score

LOD\_mp: multi-point linkage LOD score

Supplementary Table 2 Single- and Multi-point non-parametric linkage findings (and marker positions) for major depressive disorder in the Australian NAG heavy smoking genomescan sample by chromosome

| Chromosome | Marker  | LOD_sp | POS(cM) | LOD_mp |
|------------|---------|--------|---------|--------|
| 5          |         | .      | 21.190  | -0.32  |
| 5          |         | .      | 23.190  | -0.31  |
| 5          | D5S2095 | -0.15  | 23.440  | .      |
| 5          |         | .      | 25.190  | -0.25  |
| 5          |         | .      | 27.190  | -0.19  |
| 5          |         | .      | 29.190  | -0.12  |
| 5          |         | .      | 31.190  | -0.07  |
| 5          |         | .      | 33.190  | -0.03  |
| 5          |         | .      | 35.190  | -0.01  |
| 5          | D5S416  | 0.05   | 36.733  | .      |
| 5          |         | .      | 37.190  | 0.00   |
| 5          |         | .      | 39.190  | -0.01  |
| 5          |         | .      | 41.190  | -0.01  |
| 5          |         | .      | 43.190  | -0.03  |
| 5          |         | .      | 45.190  | -0.04  |
| 5          | D5S419  | -0.05  | 46.200  | .      |
| 5          |         | .      | 47.190  | -0.04  |
| 5          |         | .      | 49.190  | -0.03  |
| 5          |         | .      | 51.190  | -0.03  |
| 5          |         | .      | 53.190  | -0.02  |
| 5          |         | .      | 55.190  | -0.02  |
| 5          | D5S426  | 0.00   | 56.810  | .      |
| 5          |         | .      | 57.190  | -0.02  |
| 5          |         | .      | 59.190  | -0.01  |
| 5          |         | .      | 61.190  | 0.00   |
| 5          |         | .      | 63.190  | 0.00   |
| 5          | D5S418  | -0.01  | 64.560  | .      |
| 5          |         | .      | 65.190  | 0.00   |
| 5          |         | .      | 67.190  | 0.00   |
| 5          |         | .      | 69.190  | 0.01   |
| 5          |         | .      | 71.190  | 0.01   |
| 5          | D5S407  | -0.02  | 71.922  | .      |
| 5          |         | .      | 73.190  | 0.00   |
| 5          |         | .      | 75.190  | 0.00   |
| 5          |         | .      | 77.190  | 0.00   |
| 5          | D5S647  | -0.01  | 78.889  | .      |
| 5          |         | .      | 79.190  | 0.00   |
| 5          |         | .      | 81.190  | 0.00   |
| 5          |         | .      | 83.190  | 0.00   |
| 5          |         | .      | 85.190  | 0.00   |
| 5          |         | .      | 87.190  | 0.00   |
| 5          |         | .      | 89.190  | 0.00   |
| 5          | D5S424  | -0.01  | 90.870  | .      |
| 5          |         | .      | 91.190  | 0.00   |
| 5          |         | .      | 93.190  | 0.00   |

LOD\_sp: single-point linkage LOD score  
LOD\_mp: multi-point linkage LOD score

Supplementary Table 2 Single- and Multi-point non-parametric linkage findings (and marker positions) for major depressive disorder in the Australian NAG heavy smoking genomescan sample by chromosome

| Chromosome | Marker  | LOD_sp | POS(cM) | LOD_mp |
|------------|---------|--------|---------|--------|
| 5          | .       | .      | 95.190  | -0.01  |
| 5          | .       | .      | 97.190  | -0.03  |
| 5          | D5S641  | -0.31  | 99.098  | .      |
| 5          | .       | .      | 99.190  | -0.05  |
| 5          | .       | .      | 101.190 | -0.02  |
| 5          | D5S428  | 0.00   | 101.880 | .      |
| 5          | .       | .      | 103.190 | 0.00   |
| 5          | .       | .      | 105.190 | 0.02   |
| 5          | .       | .      | 107.190 | 0.09   |
| 5          | D5S644  | 0.29   | 108.550 | .      |
| 5          | .       | .      | 109.190 | 0.21   |
| 5          | .       | .      | 111.190 | 0.44   |
| 5          | D5S433  | 1.06   | 112.580 | .      |
| 5          | .       | .      | 113.190 | 0.61   |
| 5          | .       | .      | 115.190 | 0.55   |
| 5          | .       | .      | 117.190 | 0.48   |
| 5          | D5S2027 | 0.55   | 118.120 | .      |
| 5          | .       | .      | 119.190 | 0.42   |
| 5          | .       | .      | 121.190 | 0.37   |
| 5          | .       | .      | 123.190 | 0.32   |
| 5          | D5S471  | 0.60   | 124.980 | .      |
| 5          | .       | .      | 125.190 | 0.27   |
| 5          | .       | .      | 127.190 | 0.32   |
| 5          | .       | .      | 129.190 | 0.35   |
| 5          | .       | .      | 131.190 | 0.38   |
| 5          | .       | .      | 133.190 | 0.39   |
| 5          | .       | .      | 135.190 | 0.39   |
| 5          | D5S2115 | 0.29   | 136.750 | .      |
| 5          | .       | .      | 137.190 | 0.38   |
| 5          | .       | .      | 139.190 | 0.41   |
| 5          | .       | .      | 141.190 | 0.42   |
| 5          | .       | .      | 143.190 | 0.41   |
| 5          | .       | .      | 145.190 | 0.38   |
| 5          | D5S436  | 0.69   | 147.140 | .      |
| 5          | .       | .      | 147.190 | 0.34   |
| 5          | .       | .      | 149.190 | 0.32   |
| 5          | .       | .      | 151.190 | 0.29   |
| 5          | .       | .      | 153.190 | 0.24   |
| 5          | .       | .      | 155.190 | 0.19   |
| 5          | .       | .      | 157.190 | 0.14   |
| 5          | D5S410  | 0.13   | 158.440 | .      |
| 5          | .       | .      | 159.190 | 0.13   |
| 5          | .       | .      | 161.190 | 0.17   |
| 5          | .       | .      | 163.190 | 0.20   |
| 5          | .       | .      | 165.190 | 0.23   |

LOD\_sp: single-point linkage LOD score

LOD\_mp: multi-point linkage LOD score

Supplementary Table 2 Single- and Multi-point non-parametric linkage findings (and marker positions) for major depressive disorder in the Australian NAG heavy smoking genomescan sample by chromosome

| Chromosome | Marker  | LOD_sp | POS(cM) | LOD_mp |
|------------|---------|--------|---------|--------|
| 5          | D5S422  | 0.20   | 166.117 | .      |
| 5          | .       | .      | 167.190 | 0.25   |
| 5          | .       | .      | 169.190 | 0.25   |
| 5          | .       | .      | 171.190 | 0.24   |
| 5          | .       | .      | 173.190 | 0.21   |
| 5          | .       | .      | 175.190 | 0.17   |
| 5          | D5S400  | 0.06   | 177.010 | .      |
| 5          | .       | .      | 177.190 | 0.14   |
| 5          | .       | .      | 179.190 | 0.14   |
| 5          | .       | .      | 181.190 | 0.13   |
| 5          | .       | .      | 183.190 | 0.13   |
| 5          | .       | .      | 185.190 | 0.12   |
| 5          | .       | .      | 187.190 | 0.12   |
| 5          | .       | .      | 189.190 | 0.12   |
| 5          | .       | .      | 191.190 | 0.13   |
| 5          | .       | .      | 193.190 | 0.13   |
| 5          | .       | .      | 195.190 | 0.13   |
| 5          | .       | .      | 197.190 | 0.14   |
| 5          | .       | .      | 199.190 | 0.14   |
| 5          | .       | .      | 201.190 | 0.15   |
| 5          | .       | .      | 203.190 | 0.15   |
| 5          | D5S408  | 0.11   | 205.050 | .      |
| 5          | .       | .      | 205.190 | 0.16   |
| 6          | D6S1574 | 0.26   | 15.180  | 0.15   |
| 6          | .       | .      | 17.180  | 0.09   |
| 6          | .       | .      | 19.180  | 0.05   |
| 6          | D6S309  | -0.01  | 20.500  | .      |
| 6          | .       | .      | 21.180  | 0.02   |
| 6          | .       | .      | 23.180  | 0.02   |
| 6          | D6S470  | 0.06   | 23.750  | .      |
| 6          | .       | .      | 25.180  | 0.03   |
| 6          | .       | .      | 27.180  | 0.06   |
| 6          | .       | .      | 29.180  | 0.08   |
| 6          | .       | .      | 31.180  | 0.09   |
| 6          | .       | .      | 33.180  | 0.08   |
| 6          | D6S289  | 0.38   | 34.610  | .      |
| 6          | .       | .      | 35.180  | 0.09   |
| 6          | .       | .      | 37.180  | 0.14   |
| 6          | .       | .      | 39.180  | 0.18   |
| 6          | .       | .      | 41.180  | 0.19   |
| 6          | D6S422  | 0.04   | 42.830  | .      |
| 6          | .       | .      | 43.180  | 0.18   |
| 6          | .       | .      | 45.180  | 0.18   |
| 6          | .       | .      | 47.180  | 0.17   |
| 6          | D6S276  | 0.10   | 47.930  | .      |

LOD\_sp: single-point linkage LOD score

LOD\_mp: multi-point linkage LOD score



Supplementary Table 2 Single- and Multi-point non-parametric linkage findings (and marker positions) for major depressive disorder in the Australian NAG heavy smoking genomescan sample by chromosome

| Chromosome | Marker  | LOD_sp | POS(cM) | LOD_mp |
|------------|---------|--------|---------|--------|
| 6          | .       | .      | 49.180  | 0.15   |
| 6          | .       | .      | 51.180  | 0.13   |
| 6          | .       | .      | 53.180  | 0.10   |
| 6          | .       | .      | 55.180  | 0.08   |
| 6          | .       | .      | 57.180  | 0.05   |
| 6          | D6S1610 | 0.00   | 58.468  | .      |
| 6          | .       | .      | 59.180  | 0.03   |
| 6          | .       | .      | 61.180  | 0.02   |
| 6          | .       | .      | 63.180  | 0.01   |
| 6          | .       | .      | 65.180  | 0.01   |
| 6          | .       | .      | 67.180  | 0.00   |
| 6          | .       | .      | 69.180  | 0.00   |
| 6          | .       | .      | 71.180  | 0.00   |
| 6          | .       | .      | 73.180  | 0.00   |
| 6          | .       | .      | 75.180  | -0.01  |
| 6          | .       | .      | 77.180  | -0.01  |
| 6          | .       | .      | 79.180  | -0.01  |
| 6          | D6S257  | 0.00   | 79.520  | .      |
| 6          | .       | .      | 81.180  | -0.01  |
| 6          | .       | .      | 83.180  | -0.01  |
| 6          | .       | .      | 85.180  | -0.01  |
| 6          | .       | .      | 87.180  | -0.01  |
| 6          | .       | .      | 89.180  | -0.01  |
| 6          | D6S460  | 0.02   | 90.580  | .      |
| 6          | .       | .      | 91.180  | -0.01  |
| 6          | .       | .      | 93.180  | 0.00   |
| 6          | .       | .      | 95.180  | 0.00   |
| 6          | .       | .      | 97.180  | 0.00   |
| 6          | D6S462  | 0.00   | 97.756  | .      |
| 6          | .       | .      | 99.180  | 0.00   |
| 6          | .       | .      | 101.180 | 0.00   |
| 6          | .       | .      | 103.180 | 0.01   |
| 6          | .       | .      | 105.180 | 0.02   |
| 6          | D6S434  | 0.19   | 106.203 | .      |
| 6          | .       | .      | 107.180 | 0.03   |
| 6          | .       | .      | 109.180 | 0.04   |
| 6          | .       | .      | 111.180 | 0.04   |
| 6          | .       | .      | 113.180 | 0.05   |
| 6          | .       | .      | 115.180 | 0.05   |
| 6          | .       | .      | 117.180 | 0.05   |
| 6          | .       | .      | 119.180 | 0.05   |
| 6          | D6S287  | 0.04   | 119.550 | .      |
| 6          | .       | .      | 121.180 | 0.06   |
| 6          | .       | .      | 123.180 | 0.07   |
| 6          | .       | .      | 125.180 | 0.08   |

LOD\_sp: single-point linkage LOD score

LOD\_mp: multi-point linkage LOD score

Supplementary Table 2 Single- and Multi-point non-parametric linkage findings (and marker positions) for major depressive disorder in the Australian NAG heavy smoking genomescan sample by chromosome

| Chromosome | Marker  | LOD_sp | POS(cM) | LOD_mp |
|------------|---------|--------|---------|--------|
| 6          |         | .      | 127.180 | 0.08   |
| 6          |         | .      | 129.180 | 0.08   |
| 6          | D6S262  | 0.08   | 130.730 | .      |
| 6          |         | .      | 131.180 | 0.06   |
| 6          |         | .      | 133.180 | 0.01   |
| 6          |         | .      | 135.180 | -0.01  |
| 6          | D6S292  | 0.00   | 136.389 | .      |
| 6          |         | .      | 137.180 | -0.06  |
| 6          |         | .      | 139.180 | -0.14  |
| 6          |         | .      | 141.180 | -0.25  |
| 6          |         | .      | 143.180 | -0.39  |
| 6          | D6S308  | -0.24  | 144.820 | .      |
| 6          |         | .      | 145.180 | -0.50  |
| 6          |         | .      | 147.180 | -0.56  |
| 6          |         | .      | 149.180 | -0.59  |
| 6          |         | .      | 151.180 | -0.60  |
| 6          |         | .      | 153.180 | -0.58  |
| 6          |         | .      | 155.180 | -0.55  |
| 6          |         | .      | 157.180 | -0.49  |
| 6          |         | .      | 159.180 | -0.40  |
| 6          | D6S441  | -0.21  | 160.291 | .      |
| 6          |         | .      | 161.180 | -0.32  |
| 6          |         | .      | 163.180 | -0.28  |
| 6          |         | .      | 165.180 | -0.24  |
| 6          |         | .      | 167.180 | -0.20  |
| 6          |         | .      | 169.180 | -0.16  |
| 6          | D6S1581 | -0.09  | 169.883 | .      |
| 6          |         | .      | 171.180 | -0.14  |
| 6          |         | .      | 173.180 | -0.11  |
| 6          |         | .      | 175.180 | -0.07  |
| 6          |         | .      | 177.180 | -0.04  |
| 6          |         | .      | 179.180 | -0.01  |
| 6          | D6S264  | 0.03   | 180.947 | .      |
| 6          |         | .      | 181.180 | 0.00   |
| 6          |         | .      | 183.180 | -0.01  |
| 6          |         | .      | 185.180 | -0.01  |
| 6          |         | .      | 187.180 | -0.01  |
| 6          | D6S281  | 0.00   | 188.380 | .      |
| 6          | D6S446  | -0.03  | 189.160 | .      |
| 6          |         | .      | 189.180 | 0.00   |
| 7          | D7S531  | -0.23  | 7.512   | -0.25  |
| 7          | D7S517  | -0.19  | 8.690   | .      |
| 7          |         | .      | 9.512   | -0.23  |
| 7          |         | .      | 11.512  | -0.20  |
| 7          |         | .      | 13.512  | -0.16  |

LOD\_sp: single-point linkage LOD score

LOD\_mp: multi-point linkage LOD score

Supplementary Table 2 Single- and Multi-point non-parametric linkage findings (and marker positions) for major depressive disorder in the Australian NAG heavy smoking genomescan sample by chromosome

| Chromosome | Marker | LOD_sp | POS(cM) | LOD_mp |
|------------|--------|--------|---------|--------|
| 7          | .      | .      | 15.512  | -0.11  |
| 7          | .      | .      | 17.512  | -0.07  |
| 7          | .      | .      | 19.512  | -0.04  |
| 7          | .      | .      | 21.512  | -0.02  |
| 7          | D7S513 | -0.07  | 22.620  | .      |
| 7          | .      | .      | 23.512  | -0.01  |
| 7          | .      | .      | 25.512  | -0.01  |
| 7          | .      | .      | 27.512  | -0.01  |
| 7          | .      | .      | 29.512  | -0.01  |
| 7          | D7S507 | 0.01   | 31.510  | .      |
| 7          | .      | .      | 31.512  | -0.01  |
| 7          | .      | .      | 33.512  | 0.00   |
| 7          | .      | .      | 35.512  | 0.02   |
| 7          | D7S493 | 0.08   | 36.920  | .      |
| 7          | .      | .      | 37.512  | 0.04   |
| 7          | .      | .      | 39.512  | 0.06   |
| 7          | .      | .      | 41.512  | 0.07   |
| 7          | .      | .      | 43.512  | 0.08   |
| 7          | D7S516 | 0.16   | 44.272  | .      |
| 7          | .      | .      | 45.512  | 0.10   |
| 7          | .      | .      | 47.512  | 0.14   |
| 7          | .      | .      | 49.512  | 0.16   |
| 7          | .      | .      | 51.512  | 0.18   |
| 7          | .      | .      | 53.512  | 0.18   |
| 7          | D7S484 | 0.00   | 54.650  | .      |
| 7          | .      | .      | 55.512  | 0.17   |
| 7          | .      | .      | 57.512  | 0.15   |
| 7          | .      | .      | 59.512  | 0.12   |
| 7          | D7S510 | 0.05   | 60.483  | .      |
| 7          | .      | .      | 61.512  | 0.06   |
| 7          | .      | .      | 63.512  | 0.01   |
| 7          | .      | .      | 65.512  | -0.01  |
| 7          | .      | .      | 67.512  | -0.04  |
| 7          | D7S519 | -0.11  | 68.660  | .      |
| 7          | .      | .      | 69.512  | -0.09  |
| 7          | .      | .      | 71.512  | -0.13  |
| 7          | .      | .      | 73.512  | -0.16  |
| 7          | .      | .      | 75.512  | -0.20  |
| 7          | .      | .      | 77.512  | -0.22  |
| 7          | D7S502 | -0.21  | 79.279  | .      |
| 7          | .      | .      | 79.512  | -0.23  |
| 7          | .      | .      | 81.512  | -0.26  |
| 7          | .      | .      | 83.512  | -0.29  |
| 7          | .      | .      | 85.512  | -0.30  |
| 7          | .      | .      | 87.512  | -0.29  |

LOD\_sp: single-point linkage LOD score  
LOD\_mp: multi-point linkage LOD score

Supplementary Table 2 Single- and Multi-point non-parametric linkage findings (and marker positions) for major depressive disorder in the Australian NAG heavy smoking genomescan sample by chromosome

| Chromosome | Marker | LOD_sp | POS(cM) | LOD_mp |
|------------|--------|--------|---------|--------|
| 7          | D7S669 | -0.27  | 89.390  | .      |
| 7          | .      | .      | 89.512  | -0.27  |
| 7          | .      | .      | 91.512  | -0.24  |
| 7          | .      | .      | 93.512  | -0.19  |
| 7          | .      | .      | 95.512  | -0.15  |
| 7          | .      | .      | 97.512  | -0.11  |
| 7          | .      | .      | 99.512  | -0.07  |
| 7          | D7S630 | -0.03  | 99.930  | .      |
| 7          | .      | .      | 101.512 | -0.10  |
| 7          | D7S657 | -0.15  | 103.470 | .      |
| 7          | .      | .      | 103.512 | -0.14  |
| 7          | .      | .      | 105.512 | -0.13  |
| 7          | .      | .      | 107.512 | -0.11  |
| 7          | .      | .      | 109.512 | -0.09  |
| 7          | D7S515 | -0.12  | 111.290 | .      |
| 7          | .      | .      | 111.512 | -0.07  |
| 7          | .      | .      | 113.512 | -0.07  |
| 7          | .      | .      | 115.512 | -0.05  |
| 7          | .      | .      | 117.512 | -0.03  |
| 7          | .      | .      | 119.512 | -0.01  |
| 7          | .      | .      | 121.512 | 0.00   |
| 7          | D7S486 | 0.00   | 122.440 | .      |
| 7          | .      | .      | 123.512 | 0.00   |
| 7          | .      | .      | 125.512 | 0.02   |
| 7          | .      | .      | 127.512 | 0.06   |
| 7          | .      | .      | 129.512 | 0.11   |
| 7          | D7S530 | 0.19   | 130.700 | .      |
| 7          | .      | .      | 131.512 | 0.16   |
| 7          | .      | .      | 133.512 | 0.21   |
| 7          | .      | .      | 135.512 | 0.24   |
| 7          | .      | .      | 137.512 | 0.27   |
| 7          | D7S640 | 0.60   | 138.750 | .      |
| 7          | .      | .      | 139.512 | 0.27   |
| 7          | .      | .      | 141.512 | 0.22   |
| 7          | .      | .      | 143.512 | 0.16   |
| 7          | .      | .      | 145.512 | 0.11   |
| 7          | D7S684 | 0.13   | 146.679 | .      |
| 7          | .      | .      | 147.512 | 0.06   |
| 7          | .      | .      | 149.512 | 0.01   |
| 7          | .      | .      | 151.512 | 0.00   |
| 7          | D7S661 | -0.06  | 151.860 | .      |
| 7          | .      | .      | 153.512 | 0.00   |
| 7          | .      | .      | 155.512 | -0.01  |
| 7          | .      | .      | 157.512 | -0.01  |
| 7          | .      | .      | 159.512 | -0.02  |

LOD\_sp: single-point linkage LOD score

LOD\_mp: multi-point linkage LOD score

Supplementary Table 2 Single- and Multi-point non-parametric linkage findings (and marker positions) for major depressive disorder in the Australian NAG heavy smoking genomescan sample by chromosome

| Chromosome | Marker  | LOD_sp | POS(cM) | LOD_mp |
|------------|---------|--------|---------|--------|
| 7          |         | .      | 161.512 | -0.02  |
| 7          | D7S636  | -0.15  | 162.422 | .      |
| 7          |         | .      | 163.512 | -0.02  |
| 7          |         | .      | 165.512 | -0.01  |
| 7          |         | .      | 167.512 | -0.02  |
| 7          |         | .      | 169.512 | -0.02  |
| 7          | D7S798  | -0.03  | 169.870 | .      |
| 7          |         | .      | 171.512 | -0.05  |
| 7          |         | .      | 173.512 | -0.09  |
| 7          |         | .      | 175.512 | -0.12  |
| 7          |         | .      | 177.512 | -0.14  |
| 7          |         | .      | 179.512 | -0.15  |
| 7          |         | .      | 181.512 | -0.14  |
| 7          | D7S2465 | -0.26  | 181.668 | .      |
| 7          |         | .      | 183.512 | -0.13  |
| 8          | D8S264  | -0.32  | 3.360   | -0.24  |
| 8          |         | .      | 5.360   | -0.26  |
| 8          |         | .      | 7.360   | -0.26  |
| 8          |         | .      | 9.360   | -0.24  |
| 8          |         | .      | 11.360  | -0.20  |
| 8          |         | .      | 13.360  | -0.16  |
| 8          | D8S277  | -0.13  | 15.230  | .      |
| 8          |         | .      | 15.360  | -0.13  |
| 8          |         | .      | 17.360  | -0.15  |
| 8          |         | .      | 19.360  | -0.14  |
| 8          | D8S550  | 0.00   | 20.089  | .      |
| 8          |         | .      | 21.360  | -0.15  |
| 8          |         | .      | 23.360  | -0.17  |
| 8          |         | .      | 25.360  | -0.17  |
| 8          | D8S549  | -0.20  | 26.310  | .      |
| 8          |         | .      | 27.360  | -0.15  |
| 8          |         | .      | 29.360  | -0.13  |
| 8          |         | .      | 31.360  | -0.10  |
| 8          |         | .      | 33.360  | -0.08  |
| 8          | D8S258  | 0.13   | 34.880  | .      |
| 8          |         | .      | 35.360  | -0.06  |
| 8          |         | .      | 37.360  | -0.06  |
| 8          |         | .      | 39.360  | -0.06  |
| 8          |         | .      | 41.360  | -0.05  |
| 8          |         | .      | 43.360  | -0.05  |
| 8          | D8S1771 | 0.00   | 43.740  | .      |
| 8          |         | .      | 45.360  | -0.01  |
| 8          |         | .      | 47.360  | 0.01   |
| 8          |         | .      | 49.360  | 0.08   |
| 8          |         | .      | 51.360  | 0.23   |

LOD\_sp: single-point linkage LOD score

LOD\_mp: multi-point linkage LOD score

Supplementary Table 2 Single- and Multi-point non-parametric linkage findings (and marker positions) for major depressive disorder in the Australian NAG heavy smoking genomescan sample by chromosome

| Chromosome | Marker  | LOD_sp | POS(cM) | LOD_mp |
|------------|---------|--------|---------|--------|
| 8          |         | .      | 53.360  | 0.44   |
| 8          | D8S505  | 1.24   | 54.230  | .      |
| 8          |         | .      | 55.360  | 0.48   |
| 8          |         | .      | 57.360  | 0.38   |
| 8          |         | .      | 59.360  | 0.27   |
| 8          |         | .      | 61.360  | 0.17   |
| 8          |         | .      | 63.360  | 0.09   |
| 8          |         | .      | 65.360  | 0.03   |
| 8          |         | .      | 67.360  | 0.01   |
| 8          | D8S285  | 0.00   | 68.310  | .      |
| 8          |         | .      | 69.360  | 0.00   |
| 8          |         | .      | 71.360  | -0.02  |
| 8          |         | .      | 73.360  | -0.07  |
| 8          | D8S260  | -0.39  | 73.600  | .      |
| 8          |         | .      | 75.360  | -0.11  |
| 8          |         | .      | 77.360  | -0.16  |
| 8          |         | .      | 79.360  | -0.22  |
| 8          |         | .      | 81.360  | -0.28  |
| 8          |         | .      | 83.360  | -0.33  |
| 8          |         | .      | 85.360  | -0.38  |
| 8          |         | .      | 87.360  | -0.43  |
| 8          |         | .      | 89.360  | -0.47  |
| 8          |         | .      | 91.360  | -0.52  |
| 8          |         | .      | 93.360  | -0.56  |
| 8          |         | .      | 95.360  | -0.60  |
| 8          | D8S270  | -0.58  | 97.290  | .      |
| 8          |         | .      | 97.360  | -0.63  |
| 8          |         | .      | 99.360  | -0.60  |
| 8          |         | .      | 101.360 | -0.56  |
| 8          |         | .      | 103.360 | -0.51  |
| 8          |         | .      | 105.360 | -0.46  |
| 8          |         | .      | 107.360 | -0.41  |
| 8          |         | .      | 109.360 | -0.36  |
| 8          |         | .      | 111.360 | -0.30  |
| 8          | D8S1784 | -0.03  | 112.440 | .      |
| 8          |         | .      | 113.360 | -0.30  |
| 8          |         | .      | 115.360 | -0.39  |
| 8          |         | .      | 117.360 | -0.46  |
| 8          |         | .      | 119.360 | -0.53  |
| 8          |         | .      | 121.360 | -0.59  |
| 8          |         | .      | 123.360 | -0.65  |
| 8          | D8S514  | -0.66  | 124.620 | .      |
| 8          |         | .      | 125.360 | -0.67  |
| 8          |         | .      | 127.360 | -0.64  |
| 8          |         | .      | 129.360 | -0.59  |

LOD\_sp: single-point linkage LOD score

LOD\_mp: multi-point linkage LOD score

Supplementary Table 2 Single- and Multi-point non-parametric linkage findings (and marker positions) for major depressive disorder in the Australian NAG heavy smoking genomescan sample by chromosome

| Chromosome | Marker  | LOD_sp | POS(cM) | LOD_mp |
|------------|---------|--------|---------|--------|
| 8          | .       | .      | 131.360 | -0.54  |
| 8          | .       | .      | 133.360 | -0.47  |
| 8          | .       | .      | 135.360 | -0.40  |
| 8          | .       | .      | 137.360 | -0.31  |
| 8          | .       | .      | 139.360 | -0.21  |
| 8          | D8S284  | -0.10  | 139.790 | .      |
| 8          | .       | .      | 141.360 | -0.19  |
| 8          | .       | .      | 143.360 | -0.19  |
| 8          | .       | .      | 145.360 | -0.16  |
| 8          | .       | .      | 147.360 | -0.13  |
| 8          | .       | .      | 149.360 | -0.09  |
| 8          | D8S272  | -0.05  | 150.141 | .      |
| 8          | .       | .      | 151.360 | -0.07  |
| 9          | D9S288  | 0.45   | 8.100   | 0.10   |
| 9          | .       | .      | 10.100  | 0.13   |
| 9          | .       | .      | 12.100  | 0.15   |
| 9          | .       | .      | 14.100  | 0.16   |
| 9          | .       | .      | 16.100  | 0.15   |
| 9          | D9S286  | 0.04   | 17.770  | .      |
| 9          | .       | .      | 18.100  | 0.13   |
| 9          | .       | .      | 20.100  | 0.14   |
| 9          | .       | .      | 22.100  | 0.14   |
| 9          | .       | .      | 24.100  | 0.14   |
| 9          | .       | .      | 26.100  | 0.14   |
| 9          | .       | .      | 28.100  | 0.13   |
| 9          | .       | .      | 30.100  | 0.12   |
| 9          | .       | .      | 32.100  | 0.11   |
| 9          | D9S285  | 0.09   | 33.560  | .      |
| 9          | .       | .      | 34.100  | 0.06   |
| 9          | .       | .      | 36.100  | 0.00   |
| 9          | D9S157  | -0.02  | 36.260  | .      |
| 9          | .       | .      | 38.100  | -0.01  |
| 9          | .       | .      | 40.100  | -0.03  |
| 9          | .       | .      | 42.100  | -0.06  |
| 9          | .       | .      | 44.100  | -0.10  |
| 9          | D9S171  | -0.02  | 45.570  | .      |
| 9          | .       | .      | 46.100  | -0.15  |
| 9          | .       | .      | 48.100  | -0.21  |
| 9          | .       | .      | 50.100  | -0.28  |
| 9          | D9S161  | -0.36  | 51.500  | .      |
| 9          | .       | .      | 52.100  | -0.31  |
| 9          | .       | .      | 54.100  | -0.31  |
| 9          | .       | .      | 56.100  | -0.30  |
| 9          | D9S1817 | -0.63  | 56.480  | .      |
| 9          | .       | .      | 58.100  | -0.29  |

LOD\_sp: single-point linkage LOD score

LOD\_mp: multi-point linkage LOD score

Supplementary Table 2 Single- and Multi-point non-parametric linkage findings (and marker positions) for major depressive disorder in the Australian NAG heavy smoking genomescan sample by chromosome

| Chromosome | Marker  | LOD_sp | POS(cM) | LOD_mp |
|------------|---------|--------|---------|--------|
| 9          | .       | .      | 60.100  | -0.26  |
| 9          | .       | .      | 62.100  | -0.19  |
| 9          | .       | .      | 64.100  | -0.09  |
| 9          | .       | .      | 66.100  | -0.02  |
| 9          | D9S273  | -0.18  | 66.750  | .      |
| 9          | .       | .      | 68.100  | -0.01  |
| 9          | .       | .      | 70.100  | -0.01  |
| 9          | D9S175  | -0.27  | 70.640  | .      |
| 9          | .       | .      | 72.100  | -0.01  |
| 9          | .       | .      | 74.100  | -0.01  |
| 9          | .       | .      | 76.100  | -0.01  |
| 9          | .       | .      | 78.100  | -0.01  |
| 9          | .       | .      | 80.100  | -0.02  |
| 9          | D9S167  | -0.08  | 81.010  | .      |
| 9          | .       | .      | 82.100  | -0.02  |
| 9          | .       | .      | 84.100  | -0.03  |
| 9          | .       | .      | 86.100  | -0.04  |
| 9          | .       | .      | 88.100  | -0.05  |
| 9          | .       | .      | 90.100  | -0.06  |
| 9          | .       | .      | 92.100  | -0.07  |
| 9          | D9S283  | -0.05  | 92.910  | .      |
| 9          | .       | .      | 94.100  | -0.12  |
| 9          | .       | .      | 96.100  | -0.23  |
| 9          | .       | .      | 98.100  | -0.35  |
| 9          | D9S287  | -0.35  | 98.700  | .      |
| 9          | .       | .      | 100.100 | -0.40  |
| 9          | .       | .      | 102.100 | -0.37  |
| 9          | D9S1690 | -0.22  | 104.080 | .      |
| 9          | .       | .      | 104.100 | -0.28  |
| 9          | .       | .      | 106.100 | -0.23  |
| 9          | .       | .      | 108.100 | -0.16  |
| 9          | .       | .      | 110.100 | -0.09  |
| 9          | .       | .      | 112.100 | -0.04  |
| 9          | D9S1677 | -0.19  | 112.850 | .      |
| 9          | .       | .      | 114.100 | -0.04  |
| 9          | .       | .      | 116.100 | -0.07  |
| 9          | .       | .      | 118.100 | -0.11  |
| 9          | .       | .      | 120.100 | -0.16  |
| 9          | D9S1776 | -0.79  | 121.620 | .      |
| 9          | .       | .      | 122.100 | -0.18  |
| 9          | .       | .      | 124.100 | -0.10  |
| 9          | .       | .      | 126.100 | -0.05  |
| 9          | .       | .      | 128.100 | -0.02  |
| 9          | D9S1682 | -0.07  | 128.770 | .      |
| 9          | .       | .      | 130.100 | 0.00   |

LOD\_sp: single-point linkage LOD score

LOD\_mp: multi-point linkage LOD score



Supplementary Table 2 Single- and Multi-point non-parametric linkage findings (and marker positions) for major depressive disorder in the Australian NAG heavy smoking genomescan sample by chromosome

| Chromosome | Marker   | LOD_sp | POS(cM) | LOD_mp |
|------------|----------|--------|---------|--------|
| 9          | .        | .      | 132.100 | 0.00   |
| 9          | .        | .      | 134.100 | 0.02   |
| 9          | .        | .      | 136.100 | 0.05   |
| 9          | D9S290   | 0.01   | 136.400 | .      |
| 9          | .        | .      | 138.100 | 0.02   |
| 9          | .        | .      | 140.100 | 0.00   |
| 9          | .        | .      | 142.100 | 0.00   |
| 9          | .        | .      | 144.100 | -0.02  |
| 9          | .        | .      | 146.100 | -0.06  |
| 9          | D9S164   | -0.06  | 146.920 | .      |
| 9          | .        | .      | 148.100 | -0.09  |
| 9          | .        | .      | 150.100 | -0.10  |
| 9          | .        | .      | 152.100 | -0.10  |
| 9          | .        | .      | 154.100 | -0.08  |
| 9          | .        | .      | 156.100 | -0.06  |
| 9          | D9S1826  | -0.52  | 157.730 | .      |
| 9          | .        | .      | 158.100 | 0.00   |
| 9          | D9S158   | 0.01   | 158.312 | .      |
| 9          | .        | .      | 160.100 | 0.00   |
| 10         | D10S249  | 0.07   | 1.180   | 0.09   |
| 10         | .        | .      | 3.180   | 0.13   |
| 10         | .        | .      | 5.180   | 0.17   |
| 10         | .        | .      | 7.180   | 0.21   |
| 10         | .        | .      | 9.180   | 0.26   |
| 10         | .        | .      | 11.180  | 0.30   |
| 10         | .        | .      | 13.180  | 0.33   |
| 10         | D10S591  | 0.21   | 14.380  | .      |
| 10         | .        | .      | 15.180  | 0.32   |
| 10         | .        | .      | 17.180  | 0.23   |
| 10         | .        | .      | 19.180  | 0.14   |
| 10         | D10S189  | 0.00   | 19.780  | .      |
| 10         | .        | .      | 21.180  | 0.03   |
| 10         | .        | .      | 23.180  | -0.01  |
| 10         | .        | .      | 25.180  | -0.13  |
| 10         | .        | .      | 27.180  | -0.35  |
| 10         | D10S547  | -0.32  | 27.790  | .      |
| 10         | .        | .      | 29.180  | -0.47  |
| 10         | .        | .      | 31.180  | -0.51  |
| 10         | .        | .      | 33.180  | -0.52  |
| 10         | .        | .      | 35.180  | -0.50  |
| 10         | .        | .      | 37.180  | -0.45  |
| 10         | D10S1653 | -0.26  | 37.750  | .      |
| 10         | .        | .      | 39.180  | -0.44  |
| 10         | .        | .      | 41.180  | -0.43  |
| 10         | .        | .      | 43.180  | -0.41  |

LOD\_sp: single-point linkage LOD score

LOD\_mp: multi-point linkage LOD score

Supplementary Table 2 Single- and Multi-point non-parametric linkage findings (and marker positions) for major depressive disorder in the Australian NAG heavy smoking genomescan sample by chromosome

| Chromosome | Marker   | LOD_sp | POS(cM) | LOD_mp |
|------------|----------|--------|---------|--------|
| 10         | D10S548  | -0.43  | 43.400  | .      |
| 10         | .        | .      | 45.180  | -0.33  |
| 10         | .        | .      | 47.180  | -0.23  |
| 10         | .        | .      | 49.180  | -0.14  |
| 10         | D10S197  | 0.00   | 50.040  | .      |
| 10         | .        | .      | 51.180  | -0.11  |
| 10         | .        | .      | 53.180  | -0.09  |
| 10         | .        | .      | 55.180  | -0.08  |
| 10         | .        | .      | 57.180  | -0.06  |
| 10         | .        | .      | 59.180  | -0.04  |
| 10         | D10S208  | 0.00   | 59.940  | .      |
| 10         | .        | .      | 61.180  | -0.06  |
| 10         | .        | .      | 63.180  | -0.12  |
| 10         | .        | .      | 65.180  | -0.18  |
| 10         | .        | .      | 67.180  | -0.25  |
| 10         | .        | .      | 69.180  | -0.30  |
| 10         | D10S196  | -0.31  | 70.070  | .      |
| 10         | .        | .      | 71.180  | -0.40  |
| 10         | .        | .      | 73.180  | -0.53  |
| 10         | .        | .      | 75.180  | -0.65  |
| 10         | .        | .      | 77.180  | -0.76  |
| 10         | .        | .      | 79.180  | -0.86  |
| 10         | D10S1652 | -0.99  | 80.610  | .      |
| 10         | .        | .      | 81.180  | -0.92  |
| 10         | .        | .      | 83.180  | -0.89  |
| 10         | .        | .      | 85.180  | -0.82  |
| 10         | .        | .      | 87.180  | -0.72  |
| 10         | D10S537  | -0.38  | 89.160  | .      |
| 10         | .        | .      | 89.180  | -0.58  |
| 10         | .        | .      | 91.180  | -0.60  |
| 10         | .        | .      | 93.180  | -0.60  |
| 10         | .        | .      | 95.180  | -0.61  |
| 10         | .        | .      | 97.180  | -0.61  |
| 10         | .        | .      | 99.180  | -0.61  |
| 10         | .        | .      | 101.180 | -0.61  |
| 10         | .        | .      | 103.180 | -0.61  |
| 10         | D10S1686 | -0.47  | 104.870 | .      |
| 10         | .        | .      | 105.180 | -0.59  |
| 10         | .        | .      | 107.180 | -0.52  |
| 10         | .        | .      | 109.180 | -0.45  |
| 10         | .        | .      | 111.180 | -0.36  |
| 10         | .        | .      | 113.180 | -0.26  |
| 10         | D10S185  | -0.28  | 113.339 | .      |
| 10         | .        | .      | 115.180 | -0.21  |
| 10         | .        | .      | 117.180 | -0.15  |

LOD\_sp: single-point linkage LOD score

LOD\_mp: multi-point linkage LOD score

Supplementary Table 2 Single- and Multi-point non-parametric linkage findings (and marker positions) for major depressive disorder in the Australian NAG heavy smoking genomescan sample by chromosome

| Chromosome | Marker   | LOD_sp | POS(cM) | LOD_mp |
|------------|----------|--------|---------|--------|
| 10         | .        | .      | 119.180 | -0.09  |
| 10         | D10S192  | -0.01  | 120.753 | .      |
| 10         | .        | .      | 121.180 | -0.06  |
| 10         | .        | .      | 123.180 | -0.07  |
| 10         | .        | .      | 125.180 | -0.09  |
| 10         | D10S597  | -0.31  | 126.700 | .      |
| 10         | .        | .      | 127.180 | -0.09  |
| 10         | .        | .      | 129.180 | -0.09  |
| 10         | .        | .      | 131.180 | -0.09  |
| 10         | .        | .      | 133.180 | -0.08  |
| 10         | .        | .      | 135.180 | -0.07  |
| 10         | .        | .      | 137.180 | -0.06  |
| 10         | D10S1693 | 0.00   | 138.390 | .      |
| 10         | .        | .      | 139.180 | -0.06  |
| 10         | .        | .      | 141.180 | -0.07  |
| 10         | .        | .      | 143.180 | -0.07  |
| 10         | .        | .      | 145.180 | -0.06  |
| 10         | .        | .      | 147.180 | -0.04  |
| 10         | D10S587  | -0.01  | 148.870 | .      |
| 10         | .        | .      | 149.180 | -0.02  |
| 10         | .        | .      | 151.180 | -0.02  |
| 10         | .        | .      | 153.180 | -0.02  |
| 10         | .        | .      | 155.180 | -0.02  |
| 10         | .        | .      | 157.180 | -0.02  |
| 10         | .        | .      | 159.180 | -0.02  |
| 10         | D10S217  | 0.00   | 159.850 | .      |
| 10         | .        | .      | 161.180 | -0.01  |
| 10         | .        | .      | 163.180 | -0.01  |
| 10         | .        | .      | 165.180 | 0.00   |
| 10         | .        | .      | 167.180 | 0.00   |
| 10         | .        | .      | 169.180 | 0.00   |
| 10         | .        | .      | 171.180 | 0.00   |
| 10         | D10S1651 | 0.01   | 171.950 | .      |
| 10         | .        | .      | 173.180 | 0.01   |
| 10         | .        | .      | 175.180 | 0.07   |
| 10         | .        | .      | 177.180 | 0.17   |
| 10         | D10S212  | 0.30   | 177.190 | .      |
| 10         | .        | .      | 179.180 | 0.17   |
| 11         | D11S4046 | 0.00   | 1.263   | -0.01  |
| 11         | .        | .      | 3.263   | -0.01  |
| 11         | .        | .      | 5.263   | -0.01  |
| 11         | .        | .      | 7.263   | -0.01  |
| 11         | .        | .      | 9.263   | -0.01  |
| 11         | D11S1338 | -0.05  | 9.770   | .      |
| 11         | .        | .      | 11.263  | -0.02  |

LOD\_sp: single-point linkage LOD score

LOD\_mp: multi-point linkage LOD score

Supplementary Table 2 Single- and Multi-point non-parametric linkage findings (and marker positions) for major depressive disorder in the Australian NAG heavy smoking genomescan sample by chromosome

| Chromosome | Marker   | LOD_sp | POS(cM) | LOD_mp |
|------------|----------|--------|---------|--------|
| 11         | .        | .      | 13.263  | -0.03  |
| 11         | .        | .      | 15.263  | -0.06  |
| 11         | .        | .      | 17.263  | -0.09  |
| 11         | .        | .      | 19.263  | -0.12  |
| 11         | .        | .      | 21.263  | -0.15  |
| 11         | .        | .      | 23.263  | -0.18  |
| 11         | .        | .      | 25.263  | -0.19  |
| 11         | D11S902  | -0.19  | 25.690  | .      |
| 11         | .        | .      | 27.263  | -0.23  |
| 11         | .        | .      | 29.263  | -0.26  |
| 11         | .        | .      | 31.263  | -0.29  |
| 11         | .        | .      | 33.263  | -0.31  |
| 11         | .        | .      | 35.263  | -0.33  |
| 11         | .        | .      | 37.263  | -0.34  |
| 11         | .        | .      | 39.263  | -0.35  |
| 11         | .        | .      | 41.263  | -0.36  |
| 11         | .        | .      | 43.263  | -0.36  |
| 11         | D11S904  | -0.08  | 43.640  | .      |
| 11         | .        | .      | 45.263  | -0.37  |
| 11         | .        | .      | 47.263  | -0.35  |
| 11         | .        | .      | 49.263  | -0.32  |
| 11         | .        | .      | 51.263  | -0.27  |
| 11         | D11S935  | -0.07  | 52.940  | .      |
| 11         | .        | .      | 53.263  | -0.26  |
| 11         | .        | .      | 55.263  | -0.47  |
| 11         | .        | .      | 57.263  | -0.63  |
| 11         | D11S905  | -0.52  | 57.390  | .      |
| 11         | .        | .      | 59.263  | -0.55  |
| 11         | .        | .      | 61.263  | -0.42  |
| 11         | .        | .      | 63.263  | -0.26  |
| 11         | D11S4191 | -0.10  | 64.960  | .      |
| 11         | .        | .      | 65.263  | -0.12  |
| 11         | .        | .      | 67.263  | -0.05  |
| 11         | .        | .      | 69.263  | -0.01  |
| 11         | .        | .      | 71.263  | 0.00   |
| 11         | D11S987  | 0.00   | 72.170  | .      |
| 11         | .        | .      | 73.263  | 0.01   |
| 11         | .        | .      | 75.263  | 0.00   |
| 11         | .        | .      | 77.263  | 0.00   |
| 11         | D11S1314 | 0.00   | 78.750  | .      |
| 11         | .        | .      | 79.263  | 0.00   |
| 11         | .        | .      | 81.263  | -0.02  |
| 11         | .        | .      | 83.263  | -0.06  |
| 11         | D11S937  | -0.11  | 83.730  | .      |
| 11         | .        | .      | 85.263  | -0.19  |

LOD\_sp: single-point linkage LOD score

LOD\_mp: multi-point linkage LOD score

Supplementary Table 2 Single- and Multi-point non-parametric linkage findings (and marker positions) for major depressive disorder in the Australian NAG heavy smoking genomescan sample by chromosome

| Chromosome | Marker   | LOD_sp | POS(cM) | LOD_mp |
|------------|----------|--------|---------|--------|
| 11         | .        | .      | 87.263  | -0.36  |
| 11         | D11S901  | -0.35  | 88.480  | .      |
| 11         | .        | .      | 89.263  | -0.37  |
| 11         | .        | .      | 91.263  | -0.22  |
| 11         | D11S4175 | -0.19  | 93.040  | .      |
| 11         | .        | .      | 93.263  | -0.11  |
| 11         | .        | .      | 95.263  | -0.13  |
| 11         | .        | .      | 97.263  | -0.15  |
| 11         | .        | .      | 99.263  | -0.18  |
| 11         | .        | .      | 101.263 | -0.22  |
| 11         | .        | .      | 103.263 | -0.25  |
| 11         | D11S898  | -0.48  | 103.590 | .      |
| 11         | .        | .      | 105.263 | -0.20  |
| 11         | .        | .      | 107.263 | -0.14  |
| 11         | .        | .      | 109.263 | -0.08  |
| 11         | .        | .      | 111.263 | -0.04  |
| 11         | .        | .      | 113.263 | -0.01  |
| 11         | .        | .      | 115.263 | 0.00   |
| 11         | D11S908  | 0.00   | 116.460 | .      |
| 11         | .        | .      | 117.263 | 0.00   |
| 11         | .        | .      | 119.263 | 0.03   |
| 11         | .        | .      | 121.263 | 0.08   |
| 11         | .        | .      | 123.263 | 0.16   |
| 11         | D11S925  | 0.11   | 124.089 | .      |
| 11         | .        | .      | 125.263 | 0.18   |
| 11         | .        | .      | 127.263 | 0.14   |
| 11         | .        | .      | 129.263 | 0.10   |
| 11         | .        | .      | 131.263 | 0.06   |
| 11         | D11S4151 | -0.02  | 133.150 | .      |
| 11         | .        | .      | 133.263 | 0.03   |
| 11         | .        | .      | 135.263 | 0.04   |
| 11         | .        | .      | 137.263 | 0.05   |
| 11         | .        | .      | 139.263 | 0.05   |
| 11         | .        | .      | 141.263 | 0.06   |
| 11         | .        | .      | 143.263 | 0.06   |
| 11         | .        | .      | 145.263 | 0.06   |
| 11         | D11S1320 | 0.28   | 146.940 | .      |
| 11         | .        | .      | 147.263 | 0.05   |
| 11         | .        | .      | 149.263 | 0.05   |
| 11         | .        | .      | 151.263 | 0.04   |
| 11         | D11S968  | 0.14   | 152.450 | .      |
| 11         | .        | .      | 153.263 | 0.04   |
| 12         | D12S352  | -0.33  | 0.000   | -0.50  |
| 12         | .        | .      | 2.000   | -0.50  |
| 12         | .        | .      | 4.000   | -0.51  |

LOD\_sp: single-point linkage LOD score

LOD\_mp: multi-point linkage LOD score

Supplementary Table 2 Single- and Multi-point non-parametric linkage findings (and marker positions) for major depressive disorder in the Australian NAG heavy smoking genomescan sample by chromosome

| Chromosome | Marker   | LOD_sp | POS(cM) | LOD_mp |
|------------|----------|--------|---------|--------|
| 12         | .        | .      | 6.000   | -0.51  |
| 12         | .        | .      | 8.000   | -0.51  |
| 12         | .        | .      | 10.000  | -0.51  |
| 12         | .        | .      | 12.000  | -0.51  |
| 12         | .        | .      | 14.000  | -0.50  |
| 12         | D12S99   | -0.45  | 15.200  | .      |
| 12         | .        | .      | 16.000  | -0.49  |
| 12         | .        | .      | 18.000  | -0.46  |
| 12         | .        | .      | 20.000  | -0.43  |
| 12         | .        | .      | 22.000  | -0.38  |
| 12         | .        | .      | 24.000  | -0.33  |
| 12         | D12S336  | -0.40  | 24.040  | .      |
| 12         | .        | .      | 26.000  | -0.20  |
| 12         | .        | .      | 28.000  | -0.08  |
| 12         | .        | .      | 30.000  | -0.02  |
| 12         | D12S364  | 0.05   | 31.160  | .      |
| 12         | .        | .      | 32.000  | -0.01  |
| 12         | .        | .      | 34.000  | -0.03  |
| 12         | .        | .      | 36.000  | -0.07  |
| 12         | D12S310  | -0.05  | 36.230  | .      |
| 12         | .        | .      | 38.000  | -0.12  |
| 12         | .        | .      | 40.000  | -0.18  |
| 12         | .        | .      | 42.000  | -0.25  |
| 12         | .        | .      | 44.000  | -0.32  |
| 12         | D12S1617 | -0.52  | 45.910  | .      |
| 12         | .        | .      | 46.000  | -0.38  |
| 12         | .        | .      | 48.000  | -0.30  |
| 12         | .        | .      | 50.000  | -0.19  |
| 12         | .        | .      | 52.000  | -0.10  |
| 12         | .        | .      | 54.000  | -0.04  |
| 12         | D12S345  | -0.13  | 55.250  | .      |
| 12         | .        | .      | 56.000  | -0.01  |
| 12         | .        | .      | 58.000  | -0.01  |
| 12         | .        | .      | 60.000  | -0.01  |
| 12         | D12S85   | 0.03   | 60.490  | .      |
| 12         | .        | .      | 62.000  | 0.00   |
| 12         | .        | .      | 64.000  | 0.04   |
| 12         | .        | .      | 66.000  | 0.14   |
| 12         | D12S368  | 0.23   | 66.550  | .      |
| 12         | .        | .      | 68.000  | 0.15   |
| 12         | .        | .      | 70.000  | 0.10   |
| 12         | .        | .      | 72.000  | 0.05   |
| 12         | .        | .      | 74.000  | 0.01   |
| 12         | D12S83   | 0.00   | 74.030  | .      |
| 12         | .        | .      | 76.000  | 0.02   |

LOD\_sp: single-point linkage LOD score

LOD\_mp: multi-point linkage LOD score

Supplementary Table 2 Single- and Multi-point non-parametric linkage findings (and marker positions) for major depressive disorder in the Australian NAG heavy smoking genomescan sample by chromosome

| Chromosome | Marker  | LOD_sp | POS(cM) | LOD_mp |
|------------|---------|--------|---------|--------|
| 12         | .       | .      | 78.000  | 0.03   |
| 12         | .       | .      | 80.000  | 0.04   |
| 12         | .       | .      | 82.000  | 0.06   |
| 12         | .       | .      | 84.000  | 0.08   |
| 12         | .       | .      | 86.000  | 0.11   |
| 12         | .       | .      | 88.000  | 0.15   |
| 12         | .       | .      | 90.000  | 0.18   |
| 12         | D12S326 | 0.00   | 91.200  | .      |
| 12         | .       | .      | 92.000  | 0.25   |
| 12         | .       | .      | 94.000  | 0.40   |
| 12         | .       | .      | 96.000  | 0.58   |
| 12         | .       | .      | 98.000  | 0.74   |
| 12         | .       | .      | 100.000 | 0.88   |
| 12         | D12S351 | 0.70   | 101.060 | .      |
| 12         | .       | .      | 102.000 | 0.93   |
| 12         | .       | .      | 104.000 | 0.88   |
| 12         | .       | .      | 106.000 | 0.80   |
| 12         | .       | .      | 108.000 | 0.69   |
| 12         | .       | .      | 110.000 | 0.56   |
| 12         | D12S346 | 0.40   | 111.020 | .      |
| 12         | .       | .      | 112.000 | 0.49   |
| 12         | .       | .      | 114.000 | 0.44   |
| 12         | .       | .      | 116.000 | 0.32   |
| 12         | D12S78  | 0.10   | 116.119 | .      |
| 12         | .       | .      | 118.000 | 0.29   |
| 12         | .       | .      | 120.000 | 0.25   |
| 12         | .       | .      | 122.000 | 0.22   |
| 12         | .       | .      | 124.000 | 0.19   |
| 12         | .       | .      | 126.000 | 0.15   |
| 12         | .       | .      | 128.000 | 0.13   |
| 12         | .       | .      | 130.000 | 0.11   |
| 12         | D12S79  | 0.20   | 131.880 | .      |
| 12         | .       | .      | 132.000 | 0.09   |
| 12         | .       | .      | 134.000 | 0.06   |
| 12         | .       | .      | 136.000 | 0.02   |
| 12         | .       | .      | 138.000 | 0.00   |
| 12         | D12S86  | 0.00   | 138.060 | .      |
| 12         | .       | .      | 140.000 | 0.00   |
| 12         | .       | .      | 142.000 | 0.00   |
| 12         | .       | .      | 144.000 | -0.01  |
| 12         | .       | .      | 146.000 | -0.01  |
| 12         | .       | .      | 148.000 | -0.02  |
| 12         | D12S324 | -0.04  | 148.640 | .      |
| 12         | .       | .      | 150.000 | -0.01  |
| 12         | .       | .      | 152.000 | -0.01  |

LOD\_sp: single-point linkage LOD score

LOD\_mp: multi-point linkage LOD score

Supplementary Table 2 Single- and Multi-point non-parametric linkage findings (and marker positions) for major depressive disorder in the Australian NAG heavy smoking genomescan sample by chromosome

| Chromosome | Marker   | LOD_sp | POS(cM) | LOD_mp |
|------------|----------|--------|---------|--------|
| 12         |          | .      | 154.000 | 0.00   |
| 12         |          | .      | 156.000 | 0.00   |
| 12         |          | .      | 158.000 | 0.00   |
| 12         | D12S1659 | -0.01  | 159.600 | .      |
| 12         |          | .      | 160.000 | 0.00   |
| 12         |          | .      | 162.000 | 0.00   |
| 12         |          | .      | 164.000 | 0.00   |
| 12         |          | .      | 166.000 | 0.00   |
| 12         |          | .      | 168.000 | 0.00   |
| 12         | D12S1723 | 0.08   | 169.540 | .      |
| 12         |          | .      | 170.000 | 0.00   |
| 13         | D13S175  | -0.12  | 1.848   | -0.14  |
| 13         |          | .      | 3.848   | -0.12  |
| 13         |          | .      | 5.848   | -0.11  |
| 13         |          | .      | 7.848   | -0.09  |
| 13         |          | .      | 9.848   | -0.07  |
| 13         |          | .      | 11.848  | -0.05  |
| 13         |          | .      | 13.848  | -0.03  |
| 13         |          | .      | 15.848  | -0.02  |
| 13         |          | .      | 17.848  | -0.01  |
| 13         |          | .      | 19.848  | -0.01  |
| 13         |          | .      | 21.848  | 0.00   |
| 13         | D13S217  | 0.01   | 22.170  | .      |
| 13         |          | .      | 23.848  | 0.00   |
| 13         |          | .      | 25.848  | 0.00   |
| 13         |          | .      | 27.848  | 0.00   |
| 13         |          | .      | 29.848  | 0.01   |
| 13         | D13S171  | -0.06  | 31.070  | .      |
| 13         |          | .      | 31.848  | 0.01   |
| 13         |          | .      | 33.848  | 0.02   |
| 13         |          | .      | 35.848  | 0.04   |
| 13         |          | .      | 37.848  | 0.06   |
| 13         | D13S218  | 0.06   | 39.340  | .      |
| 13         |          | .      | 39.848  | 0.10   |
| 13         |          | .      | 41.848  | 0.24   |
| 13         | D13S263  | 0.45   | 43.240  | .      |
| 13         |          | .      | 43.848  | 0.32   |
| 13         |          | .      | 45.848  | 0.21   |
| 13         |          | .      | 47.848  | 0.12   |
| 13         |          | .      | 49.848  | 0.06   |
| 13         | D13S153  | 0.03   | 51.625  | .      |
| 13         |          | .      | 51.848  | 0.02   |
| 13         |          | .      | 53.848  | 0.02   |
| 13         |          | .      | 55.848  | 0.01   |
| 13         |          | .      | 57.848  | 0.00   |

LOD\_sp: single-point linkage LOD score

LOD\_mp: multi-point linkage LOD score



Supplementary Table 2 Single- and Multi-point non-parametric linkage findings (and marker positions) for major depressive disorder in the Australian NAG heavy smoking genomescan sample by chromosome

| Chromosome | Marker   | LOD_sp | POS(cM) | LOD_mp |
|------------|----------|--------|---------|--------|
| 13         | .        | .      | 59.848  | 0.00   |
| 13         | .        | .      | 61.848  | 0.00   |
| 13         | .        | .      | 63.848  | 0.00   |
| 13         | .        | .      | 65.848  | -0.01  |
| 13         | .        | .      | 67.848  | -0.01  |
| 13         | D13S156  | 0.02   | 69.730  | .      |
| 13         | .        | .      | 69.848  | -0.01  |
| 13         | .        | .      | 71.848  | 0.00   |
| 13         | .        | .      | 73.848  | 0.03   |
| 13         | .        | .      | 75.848  | 0.08   |
| 13         | D13S170  | 0.02   | 76.170  | .      |
| 13         | .        | .      | 77.848  | 0.10   |
| 13         | .        | .      | 79.848  | 0.10   |
| 13         | D13S265  | 0.23   | 80.819  | .      |
| 13         | .        | .      | 81.848  | 0.10   |
| 13         | .        | .      | 83.848  | 0.09   |
| 13         | .        | .      | 85.848  | 0.07   |
| 13         | .        | .      | 87.848  | 0.05   |
| 13         | .        | .      | 89.848  | 0.03   |
| 13         | .        | .      | 91.848  | 0.01   |
| 13         | D13S159  | 0.18   | 91.960  | .      |
| 13         | .        | .      | 93.848  | 0.00   |
| 13         | .        | .      | 95.848  | -0.03  |
| 13         | .        | .      | 97.848  | -0.10  |
| 13         | D13S158  | -0.19  | 98.960  | .      |
| 13         | .        | .      | 99.848  | -0.16  |
| 13         | .        | .      | 101.848 | -0.12  |
| 13         | .        | .      | 103.848 | -0.08  |
| 13         | .        | .      | 105.848 | -0.04  |
| 13         | .        | .      | 107.848 | -0.01  |
| 13         | D13S173  | 0.04   | 109.360 | .      |
| 13         | .        | .      | 109.848 | 0.00   |
| 13         | .        | .      | 111.848 | -0.02  |
| 13         | .        | .      | 113.848 | -0.06  |
| 13         | D13S1265 | -0.24  | 114.463 | .      |
| 13         | .        | .      | 115.848 | -0.10  |
| 13         | .        | .      | 117.848 | -0.14  |
| 13         | .        | .      | 119.848 | -0.17  |
| 13         | .        | .      | 121.848 | -0.18  |
| 13         | D13S285  | -0.19  | 123.780 | .      |
| 13         | .        | .      | 123.848 | -0.18  |
| 14         | D14S261  | 0.29   | 4.330   | 0.19   |
| 14         | .        | .      | 6.330   | 0.13   |
| 14         | .        | .      | 8.330   | 0.08   |
| 14         | .        | .      | 10.330  | 0.04   |

LOD\_sp: single-point linkage LOD score

LOD\_mp: multi-point linkage LOD score

Supplementary Table 2 Single- and Multi-point non-parametric linkage findings (and marker positions) for major depressive disorder in the Australian NAG heavy smoking genomescan sample by chromosome

| Chromosome | Marker  | LOD_sp | POS(cM) | LOD_mp |
|------------|---------|--------|---------|--------|
| 14         | .       | .      | 12.330  | 0.01   |
| 14         | .       | .      | 14.330  | 0.00   |
| 14         | D14S283 | 0.00   | 14.700  | .      |
| 14         | .       | .      | 16.330  | -0.02  |
| 14         | .       | .      | 18.330  | -0.14  |
| 14         | .       | .      | 20.330  | -0.35  |
| 14         | D14S275 | -0.60  | 22.210  | .      |
| 14         | .       | .      | 22.330  | -0.52  |
| 14         | .       | .      | 24.330  | -0.44  |
| 14         | .       | .      | 26.330  | -0.37  |
| 14         | .       | .      | 28.330  | -0.30  |
| 14         | .       | .      | 30.330  | -0.24  |
| 14         | .       | .      | 32.330  | -0.18  |
| 14         | .       | .      | 34.330  | -0.14  |
| 14         | .       | .      | 36.330  | -0.11  |
| 14         | D14S70  | -0.02  | 36.370  | .      |
| 14         | .       | .      | 38.330  | -0.17  |
| 14         | .       | .      | 40.330  | -0.21  |
| 14         | .       | .      | 42.330  | -0.21  |
| 14         | D14S288 | -0.06  | 44.000  | .      |
| 14         | .       | .      | 44.330  | -0.19  |
| 14         | .       | .      | 46.330  | -0.21  |
| 14         | .       | .      | 48.330  | -0.21  |
| 14         | .       | .      | 50.330  | -0.20  |
| 14         | .       | .      | 52.330  | -0.17  |
| 14         | .       | .      | 54.330  | -0.14  |
| 14         | D14S276 | -0.12  | 54.414  | .      |
| 14         | .       | .      | 56.330  | -0.10  |
| 14         | .       | .      | 58.330  | -0.06  |
| 14         | .       | .      | 60.330  | -0.02  |
| 14         | .       | .      | 62.330  | -0.01  |
| 14         | D14S63  | 0.04   | 63.500  | .      |
| 14         | .       | .      | 64.330  | 0.00   |
| 14         | .       | .      | 66.330  | 0.01   |
| 14         | .       | .      | 68.330  | 0.02   |
| 14         | D14S258 | 0.00   | 68.540  | .      |
| 14         | .       | .      | 70.330  | 0.00   |
| 14         | .       | .      | 72.330  | -0.02  |
| 14         | .       | .      | 74.330  | -0.11  |
| 14         | .       | .      | 76.330  | -0.25  |
| 14         | D14S74  | -0.50  | 78.190  | .      |
| 14         | .       | .      | 78.330  | -0.37  |
| 14         | .       | .      | 80.330  | -0.29  |
| 14         | .       | .      | 82.330  | -0.21  |
| 14         | .       | .      | 84.330  | -0.12  |

LOD\_sp: single-point linkage LOD score

LOD\_mp: multi-point linkage LOD score

Supplementary Table 2 Single- and Multi-point non-parametric linkage findings (and marker positions) for major depressive disorder in the Australian NAG heavy smoking genomescan sample by chromosome

| Chromosome | Marker   | LOD_sp | POS(cM) | LOD_mp |
|------------|----------|--------|---------|--------|
| 14         |          | .      | 86.330  | -0.05  |
| 14         | D14S48   | 0.03   | 86.540  | .      |
| 14         |          | .      | 88.330  | -0.02  |
| 14         |          | .      | 90.330  | -0.01  |
| 14         |          | .      | 92.330  | 0.00   |
| 14         |          | .      | 94.330  | 0.00   |
| 14         | D14S280  | -0.08  | 94.420  | .      |
| 14         |          | .      | 96.330  | 0.01   |
| 14         |          | .      | 98.330  | 0.05   |
| 14         |          | .      | 100.330 | 0.11   |
| 14         |          | .      | 102.330 | 0.18   |
| 14         |          | .      | 104.330 | 0.25   |
| 14         |          | .      | 106.330 | 0.31   |
| 14         | D14S65   | 0.46   | 106.520 | .      |
| 14         |          | .      | 108.330 | 0.29   |
| 14         |          | .      | 110.330 | 0.25   |
| 14         |          | .      | 112.330 | 0.21   |
| 14         |          | .      | 114.330 | 0.17   |
| 14         | D14S985  | 0.02   | 115.830 | .      |
| 14         |          | .      | 116.330 | 0.15   |
| 14         |          | .      | 118.330 | 0.20   |
| 14         |          | .      | 120.330 | 0.25   |
| 14         |          | .      | 122.330 | 0.29   |
| 14         | D14S292  | 0.00   | 122.820 | .      |
| 14         |          | .      | 124.330 | 0.29   |
| 15         | D15S128  | -0.17  | 5.820   | -0.16  |
| 15         |          | .      | 7.820   | -0.20  |
| 15         |          | .      | 9.820   | -0.24  |
| 15         |          | .      | 11.820  | -0.27  |
| 15         |          | .      | 13.820  | -0.30  |
| 15         | D15S1002 | 0.00   | 15.050  | .      |
| 15         |          | .      | 15.820  | -0.34  |
| 15         |          | .      | 17.820  | -0.39  |
| 15         |          | .      | 19.820  | -0.42  |
| 15         |          | .      | 21.820  | -0.43  |
| 15         | D15S165  | -0.40  | 22.640  | .      |
| 15         |          | .      | 23.820  | -0.52  |
| 15         |          | .      | 25.820  | -0.67  |
| 15         |          | .      | 27.820  | -0.80  |
| 15         | D15S1007 | -0.51  | 28.860  | .      |
| 15         |          | .      | 29.820  | -0.86  |
| 15         |          | .      | 31.820  | -0.85  |
| 15         |          | .      | 33.820  | -0.82  |
| 15         |          | .      | 35.820  | -0.79  |
| 15         |          | .      | 37.820  | -0.75  |

LOD\_sp: single-point linkage LOD score

LOD\_mp: multi-point linkage LOD score

Supplementary Table 2 Single- and Multi-point non-parametric linkage findings (and marker positions) for major depressive disorder in the Australian NAG heavy smoking genomescan sample by chromosome

| Chromosome | Marker   | LOD_sp | POS(cM) | LOD_mp |
|------------|----------|--------|---------|--------|
| 15         | D15S1012 | -0.83  | 38.120  | .      |
| 15         | .        | .      | 39.820  | -0.75  |
| 15         | .        | .      | 41.820  | -0.74  |
| 15         | D15S994  | -0.18  | 42.618  | .      |
| 15         | .        | .      | 43.820  | -0.68  |
| 15         | .        | .      | 45.820  | -0.61  |
| 15         | .        | .      | 47.820  | -0.54  |
| 15         | D15S978  | -0.41  | 48.178  | .      |
| 15         | .        | .      | 49.820  | -0.47  |
| 15         | .        | .      | 51.820  | -0.41  |
| 15         | .        | .      | 53.820  | -0.34  |
| 15         | .        | .      | 55.820  | -0.27  |
| 15         | D15S117  | -0.27  | 56.460  | .      |
| 15         | .        | .      | 57.820  | -0.27  |
| 15         | .        | .      | 59.820  | -0.30  |
| 15         | .        | .      | 61.820  | -0.32  |
| 15         | .        | .      | 63.820  | -0.33  |
| 15         | .        | .      | 65.820  | -0.32  |
| 15         | .        | .      | 67.820  | -0.31  |
| 15         | D15S153  | -0.12  | 68.100  | .      |
| 15         | .        | .      | 69.820  | -0.33  |
| 15         | .        | .      | 71.820  | -0.35  |
| 15         | .        | .      | 73.820  | -0.35  |
| 15         | .        | .      | 75.820  | -0.33  |
| 15         | D15S131  | -0.34  | 76.522  | .      |
| 15         | .        | .      | 77.820  | -0.29  |
| 15         | .        | .      | 79.820  | -0.24  |
| 15         | .        | .      | 81.820  | -0.18  |
| 15         | .        | .      | 83.820  | -0.13  |
| 15         | .        | .      | 85.820  | -0.09  |
| 15         | .        | .      | 87.820  | -0.05  |
| 15         | D15S205  | -0.02  | 89.090  | .      |
| 15         | .        | .      | 89.820  | -0.04  |
| 15         | .        | .      | 91.820  | -0.05  |
| 15         | .        | .      | 93.820  | -0.06  |
| 15         | .        | .      | 95.820  | -0.05  |
| 15         | D15S127  | -0.10  | 97.260  | .      |
| 15         | .        | .      | 97.820  | -0.04  |
| 15         | .        | .      | 99.820  | -0.02  |
| 15         | .        | .      | 101.820 | 0.00   |
| 15         | .        | .      | 103.820 | 0.00   |
| 15         | .        | .      | 105.820 | 0.01   |
| 15         | .        | .      | 107.820 | 0.03   |
| 15         | D15S130  | 0.01   | 108.210 | .      |
| 15         | .        | .      | 109.820 | 0.05   |

LOD\_sp: single-point linkage LOD score

LOD\_mp: multi-point linkage LOD score

Supplementary Table 2 Single- and Multi-point non-parametric linkage findings (and marker positions) for major depressive disorder in the Australian NAG heavy smoking genomescan sample by chromosome

| Chromosome | Marker   | LOD_sp | POS(cM) | LOD_mp |
|------------|----------|--------|---------|--------|
| 15         | .        | .      | 111.820 | 0.10   |
| 15         | .        | .      | 113.820 | 0.16   |
| 15         | .        | .      | 115.820 | 0.24   |
| 15         | .        | .      | 117.820 | 0.33   |
| 15         | .        | .      | 119.820 | 0.43   |
| 15         | .        | .      | 121.820 | 0.52   |
| 15         | .        | .      | 123.820 | 0.61   |
| 15         | .        | .      | 125.820 | 0.68   |
| 15         | D15S120  | 0.52   | 126.520 | .      |
| 15         | .        | .      | 127.820 | 0.70   |
| 16         | D16S423  | -0.12  | 14.050  | -0.20  |
| 16         | .        | .      | 16.050  | -0.18  |
| 16         | .        | .      | 18.050  | -0.17  |
| 16         | .        | .      | 20.050  | -0.16  |
| 16         | .        | .      | 22.050  | -0.16  |
| 16         | .        | .      | 24.050  | -0.17  |
| 16         | D16S404  | -0.12  | 24.890  | .      |
| 16         | .        | .      | 26.050  | -0.18  |
| 16         | .        | .      | 28.050  | -0.20  |
| 16         | D16S3075 | -0.09  | 29.510  | .      |
| 16         | .        | .      | 30.050  | -0.21  |
| 16         | .        | .      | 32.050  | -0.23  |
| 16         | .        | .      | 34.050  | -0.23  |
| 16         | .        | .      | 36.050  | -0.22  |
| 16         | D16S3103 | -0.36  | 37.970  | .      |
| 16         | .        | .      | 38.050  | -0.19  |
| 16         | .        | .      | 40.050  | -0.11  |
| 16         | .        | .      | 42.050  | -0.05  |
| 16         | D16S3046 | -0.17  | 42.990  | .      |
| 16         | .        | .      | 44.050  | -0.04  |
| 16         | .        | .      | 46.050  | -0.03  |
| 16         | .        | .      | 48.050  | -0.02  |
| 16         | D16S3068 | -0.05  | 49.500  | .      |
| 16         | .        | .      | 50.050  | -0.01  |
| 16         | .        | .      | 52.050  | 0.00   |
| 16         | .        | .      | 54.050  | 0.00   |
| 16         | .        | .      | 56.050  | 0.00   |
| 16         | .        | .      | 58.050  | 0.00   |
| 16         | .        | .      | 60.050  | 0.00   |
| 16         | D16S3136 | 0.09   | 60.350  | .      |
| 16         | .        | .      | 62.050  | 0.01   |
| 16         | .        | .      | 64.050  | 0.07   |
| 16         | .        | .      | 66.050  | 0.17   |
| 16         | D16S415  | 0.02   | 66.975  | .      |
| 16         | .        | .      | 68.050  | 0.23   |

LOD\_sp: single-point linkage LOD score

LOD\_mp: multi-point linkage LOD score

Supplementary Table 2 Single- and Multi-point non-parametric linkage findings (and marker positions) for major depressive disorder in the Australian NAG heavy smoking genomescan sample by chromosome

| Chromosome | Marker   | LOD_sp | POS(cM) | LOD_mp |
|------------|----------|--------|---------|--------|
| 16         | .        | .      | 70.050  | 0.22   |
| 16         | .        | .      | 72.050  | 0.21   |
| 16         | .        | .      | 74.050  | 0.19   |
| 16         | .        | .      | 76.050  | 0.16   |
| 16         | .        | .      | 78.050  | 0.14   |
| 16         | .        | .      | 80.050  | 0.12   |
| 16         | D16S503  | 0.02   | 81.785  | .      |
| 16         | .        | .      | 82.050  | 0.10   |
| 16         | .        | .      | 84.050  | 0.09   |
| 16         | .        | .      | 86.050  | 0.07   |
| 16         | .        | .      | 88.050  | 0.06   |
| 16         | .        | .      | 90.050  | 0.04   |
| 16         | .        | .      | 92.050  | 0.03   |
| 16         | D16S515  | 0.14   | 92.060  | .      |
| 16         | .        | .      | 94.050  | 0.09   |
| 16         | .        | .      | 96.050  | 0.21   |
| 16         | .        | .      | 98.050  | 0.34   |
| 16         | D16S516  | 0.27   | 98.525  | .      |
| 16         | .        | .      | 100.050 | 0.35   |
| 16         | .        | .      | 102.050 | 0.30   |
| 16         | .        | .      | 104.050 | 0.25   |
| 16         | .        | .      | 106.050 | 0.19   |
| 16         | .        | .      | 108.050 | 0.14   |
| 16         | D16S3091 | 0.01   | 109.590 | .      |
| 16         | .        | .      | 110.050 | 0.11   |
| 16         | .        | .      | 112.050 | 0.10   |
| 16         | .        | .      | 114.050 | 0.11   |
| 16         | .        | .      | 116.050 | 0.11   |
| 16         | .        | .      | 118.050 | 0.12   |
| 16         | .        | .      | 120.050 | 0.13   |
| 16         | .        | .      | 122.050 | 0.14   |
| 16         | D16S520  | 0.11   | 122.840 | .      |
| 16         | .        | .      | 124.050 | 0.14   |
| 17         | D17S849  | -0.56  | 0.630   | -0.71  |
| 17         | .        | .      | 2.630   | -0.56  |
| 17         | .        | .      | 4.630   | -0.40  |
| 17         | .        | .      | 6.630   | -0.22  |
| 17         | D17S831  | -0.17  | 7.219   | .      |
| 17         | .        | .      | 8.630   | -0.20  |
| 17         | .        | .      | 10.630  | -0.21  |
| 17         | .        | .      | 12.630  | -0.20  |
| 17         | .        | .      | 14.630  | -0.15  |
| 17         | .        | .      | 16.630  | -0.10  |
| 17         | D17S938  | -0.01  | 17.060  | .      |
| 17         | .        | .      | 18.630  | -0.11  |

LOD\_sp: single-point linkage LOD score

LOD\_mp: multi-point linkage LOD score

Supplementary Table 2 Single- and Multi-point non-parametric linkage findings (and marker positions) for major depressive disorder in the Australian NAG heavy smoking genomescan sample by chromosome

| Chromosome | Marker   | LOD_sp | POS(cM) | LOD_mp |
|------------|----------|--------|---------|--------|
| 17         | .        | .      | 20.630  | -0.13  |
| 17         | .        | .      | 22.630  | -0.16  |
| 17         | .        | .      | 24.630  | -0.18  |
| 17         | .        | .      | 26.630  | -0.21  |
| 17         | .        | .      | 28.630  | -0.23  |
| 17         | D17S1852 | -0.27  | 30.612  | .      |
| 17         | .        | .      | 30.630  | -0.25  |
| 17         | .        | .      | 32.630  | -0.25  |
| 17         | .        | .      | 34.630  | -0.22  |
| 17         | .        | .      | 36.630  | -0.17  |
| 17         | D17S799  | -0.66  | 37.000  | .      |
| 17         | .        | .      | 38.630  | -0.09  |
| 17         | .        | .      | 40.630  | -0.03  |
| 17         | D17S921  | 0.03   | 41.470  | .      |
| 17         | .        | .      | 42.630  | -0.01  |
| 17         | .        | .      | 44.630  | 0.00   |
| 17         | D17S1857 | 0.00   | 46.390  | .      |
| 17         | .        | .      | 46.630  | 0.00   |
| 17         | .        | .      | 48.630  | 0.00   |
| 17         | .        | .      | 50.630  | 0.01   |
| 17         | .        | .      | 52.630  | 0.01   |
| 17         | .        | .      | 54.630  | 0.02   |
| 17         | D17S798  | 0.12   | 55.600  | .      |
| 17         | .        | .      | 56.630  | 0.02   |
| 17         | .        | .      | 58.630  | 0.03   |
| 17         | .        | .      | 60.630  | 0.02   |
| 17         | .        | .      | 62.630  | 0.02   |
| 17         | .        | .      | 64.630  | 0.01   |
| 17         | .        | .      | 66.630  | 0.00   |
| 17         | .        | .      | 68.630  | 0.00   |
| 17         | .        | .      | 70.630  | 0.00   |
| 17         | .        | .      | 72.630  | -0.01  |
| 17         | D17S1868 | 0.00   | 74.530  | .      |
| 17         | .        | .      | 74.630  | -0.02  |
| 17         | .        | .      | 76.630  | -0.06  |
| 17         | .        | .      | 78.630  | -0.14  |
| 17         | .        | .      | 80.630  | -0.25  |
| 17         | D17S787  | -0.21  | 81.321  | .      |
| 17         | .        | .      | 82.630  | -0.26  |
| 17         | .        | .      | 84.630  | -0.23  |
| 17         | .        | .      | 86.630  | -0.20  |
| 17         | .        | .      | 88.630  | -0.18  |
| 17         | .        | .      | 90.630  | -0.16  |
| 17         | .        | .      | 92.630  | -0.16  |
| 17         | D17S944  | -0.06  | 92.760  | .      |

LOD\_sp: single-point linkage LOD score

LOD\_mp: multi-point linkage LOD score

Supplementary Table 2 Single- and Multi-point non-parametric linkage findings (and marker positions) for major depressive disorder in the Australian NAG heavy smoking genomescan sample by chromosome

| Chromosome | Marker  | LOD_sp | POS(cM) | LOD_mp |
|------------|---------|--------|---------|--------|
| 17         | .       | .      | 94.630  | -0.22  |
| 17         | .       | .      | 96.630  | -0.29  |
| 17         | .       | .      | 98.630  | -0.35  |
| 17         | .       | .      | 100.630 | -0.40  |
| 17         | .       | .      | 102.630 | -0.45  |
| 17         | D17S949 | -0.60  | 102.960 | .      |
| 17         | .       | .      | 104.630 | -0.39  |
| 17         | .       | .      | 106.630 | -0.30  |
| 17         | .       | .      | 108.630 | -0.20  |
| 17         | .       | .      | 110.630 | -0.12  |
| 17         | .       | .      | 112.630 | -0.06  |
| 17         | .       | .      | 114.630 | -0.02  |
| 17         | D17S785 | -0.04  | 115.340 | .      |
| 17         | .       | .      | 116.630 | -0.01  |
| 17         | .       | .      | 118.630 | 0.00   |
| 17         | .       | .      | 120.630 | 0.00   |
| 17         | .       | .      | 122.630 | 0.00   |
| 17         | .       | .      | 124.630 | 0.01   |
| 17         | .       | .      | 126.630 | 0.02   |
| 17         | .       | .      | 128.630 | 0.03   |
| 17         | D17S784 | 0.10   | 129.620 | .      |
| 17         | .       | .      | 130.630 | 0.04   |
| 17         | .       | .      | 132.630 | 0.04   |
| 17         | .       | .      | 134.630 | 0.03   |
| 17         | D17S928 | 0.06   | 135.670 | .      |
| 17         | .       | .      | 136.630 | 0.03   |
| 18         | D18S59  | -0.07  | 1.390   | -0.08  |
| 18         | .       | .      | 3.390   | -0.11  |
| 18         | .       | .      | 5.390   | -0.14  |
| 18         | .       | .      | 7.390   | -0.18  |
| 18         | .       | .      | 9.390   | -0.21  |
| 18         | D18S63  | -0.27  | 9.570   | .      |
| 18         | .       | .      | 11.390  | -0.21  |
| 18         | .       | .      | 13.390  | -0.19  |
| 18         | .       | .      | 15.390  | -0.15  |
| 18         | .       | .      | 17.390  | -0.11  |
| 18         | D18S452 | -0.02  | 17.620  | .      |
| 18         | .       | .      | 19.390  | -0.11  |
| 18         | .       | .      | 21.390  | -0.10  |
| 18         | .       | .      | 23.390  | -0.09  |
| 18         | .       | .      | 25.390  | -0.08  |
| 18         | .       | .      | 27.390  | -0.06  |
| 18         | .       | .      | 29.390  | -0.05  |
| 18         | .       | .      | 31.390  | -0.03  |
| 18         | D18S464 | 0.00   | 32.420  | .      |

LOD\_sp: single-point linkage LOD score

LOD\_mp: multi-point linkage LOD score



Supplementary Table 2 Single- and Multi-point non-parametric linkage findings (and marker positions) for major depressive disorder in the Australian NAG heavy smoking genomescan sample by chromosome

| Chromosome | Marker   | LOD_sp | POS(cM) | LOD_mp |
|------------|----------|--------|---------|--------|
| 18         | .        | .      | 33.390  | -0.02  |
| 18         | .        | .      | 35.390  | -0.02  |
| 18         | .        | .      | 37.390  | -0.01  |
| 18         | D18S53   | 0.18   | 37.670  | .      |
| 18         | .        | .      | 39.390  | -0.01  |
| 18         | .        | .      | 41.390  | 0.00   |
| 18         | .        | .      | 43.390  | 0.00   |
| 18         | .        | .      | 45.390  | 0.00   |
| 18         | .        | .      | 47.390  | 0.00   |
| 18         | .        | .      | 49.390  | 0.00   |
| 18         | D18S478  | -0.04  | 50.830  | .      |
| 18         | .        | .      | 51.390  | 0.00   |
| 18         | .        | .      | 53.390  | 0.00   |
| 18         | .        | .      | 55.390  | 0.00   |
| 18         | .        | .      | 57.390  | 0.00   |
| 18         | D18S1102 | 0.00   | 58.160  | .      |
| 18         | .        | .      | 59.390  | 0.00   |
| 18         | .        | .      | 61.390  | 0.00   |
| 18         | .        | .      | 63.390  | 0.00   |
| 18         | .        | .      | 65.390  | 0.00   |
| 18         | .        | .      | 67.390  | 0.00   |
| 18         | .        | .      | 69.390  | 0.00   |
| 18         | .        | .      | 71.390  | 0.00   |
| 18         | D18S474  | 0.03   | 72.830  | .      |
| 18         | .        | .      | 73.390  | 0.00   |
| 18         | .        | .      | 75.390  | 0.00   |
| 18         | .        | .      | 77.390  | -0.01  |
| 18         | .        | .      | 79.390  | -0.03  |
| 18         | .        | .      | 81.390  | -0.05  |
| 18         | D18S64   | -0.09  | 82.177  | .      |
| 18         | .        | .      | 83.390  | -0.02  |
| 18         | .        | .      | 85.390  | 0.00   |
| 18         | .        | .      | 87.390  | 0.03   |
| 18         | D18S68   | 0.12   | 88.780  | .      |
| 18         | .        | .      | 89.390  | 0.06   |
| 18         | .        | .      | 91.390  | 0.08   |
| 18         | .        | .      | 93.390  | 0.09   |
| 18         | .        | .      | 95.390  | 0.09   |
| 18         | .        | .      | 97.390  | 0.10   |
| 18         | D18S61   | 0.10   | 97.706  | .      |
| 18         | .        | .      | 99.390  | 0.16   |
| 18         | .        | .      | 101.390 | 0.26   |
| 18         | .        | .      | 103.390 | 0.38   |
| 18         | .        | .      | 105.390 | 0.51   |
| 18         | .        | .      | 107.390 | 0.65   |

LOD\_sp: single-point linkage LOD score

LOD\_mp: multi-point linkage LOD score

Supplementary Table 2 Single- and Multi-point non-parametric linkage findings (and marker positions) for major depressive disorder in the Australian NAG heavy smoking genomescan sample by chromosome

| Chromosome | Marker   | LOD_sp | POS(cM) | LOD_mp |
|------------|----------|--------|---------|--------|
| 18         | D18S1161 | 0.39   | 108.450 | .      |
| 18         | .        | .      | 109.390 | 0.73   |
| 18         | .        | .      | 111.390 | 0.73   |
| 18         | .        | .      | 113.390 | 0.69   |
| 18         | .        | .      | 115.390 | 0.62   |
| 18         | D18S462  | 0.68   | 116.370 | .      |
| 18         | .        | .      | 117.390 | 0.46   |
| 18         | .        | .      | 119.390 | 0.22   |
| 18         | .        | .      | 121.390 | 0.05   |
| 18         | D18S70   | 0.04   | 121.650 | .      |
| 18         | .        | .      | 123.390 | 0.04   |
| 19         | D19S209  | -0.60  | 11.380  | -0.44  |
| 19         | .        | .      | 13.380  | -0.40  |
| 19         | .        | .      | 15.380  | -0.34  |
| 19         | D19S216  | -0.60  | 16.720  | .      |
| 19         | .        | .      | 17.380  | -0.26  |
| 19         | .        | .      | 19.380  | -0.18  |
| 19         | .        | .      | 21.380  | -0.10  |
| 19         | .        | .      | 23.380  | -0.04  |
| 19         | .        | .      | 25.380  | 0.00   |
| 19         | D19S884  | -0.03  | 25.667  | .      |
| 19         | .        | .      | 27.380  | 0.00   |
| 19         | .        | .      | 29.380  | 0.00   |
| 19         | .        | .      | 31.380  | 0.01   |
| 19         | D19S221  | -0.03  | 32.390  | .      |
| 19         | .        | .      | 33.380  | 0.01   |
| 19         | .        | .      | 35.380  | 0.01   |
| 19         | D19S226  | -0.03  | 36.350  | .      |
| 19         | .        | .      | 37.380  | 0.01   |
| 19         | .        | .      | 39.380  | 0.01   |
| 19         | .        | .      | 41.380  | 0.01   |
| 19         | .        | .      | 43.380  | 0.01   |
| 19         | .        | .      | 45.380  | 0.01   |
| 19         | .        | .      | 47.380  | 0.00   |
| 19         | .        | .      | 49.380  | 0.00   |
| 19         | .        | .      | 51.380  | 0.00   |
| 19         | .        | .      | 53.380  | 0.00   |
| 19         | D19S414  | 0.01   | 53.810  | .      |
| 19         | .        | .      | 55.380  | 0.01   |
| 19         | .        | .      | 57.380  | 0.04   |
| 19         | .        | .      | 59.380  | 0.08   |
| 19         | .        | .      | 61.380  | 0.14   |
| 19         | .        | .      | 63.380  | 0.20   |
| 19         | D19S220  | 0.33   | 63.580  | .      |
| 19         | .        | .      | 65.380  | 0.26   |

LOD\_sp: single-point linkage LOD score

LOD\_mp: multi-point linkage LOD score

Supplementary Table 2 Single- and Multi-point non-parametric linkage findings (and marker positions) for major depressive disorder in the Australian NAG heavy smoking genomescan sample by chromosome

| Chromosome | Marker  | LOD_sp | POS(cM) | LOD_mp |
|------------|---------|--------|---------|--------|
| 19         | .       | .      | 67.380  | 0.31   |
| 19         | D19S420 | 0.28   | 68.940  | .      |
| 19         | .       | .      | 69.380  | 0.37   |
| 19         | .       | .      | 71.380  | 0.54   |
| 19         | .       | .      | 73.380  | 0.72   |
| 19         | .       | .      | 75.380  | 0.86   |
| 19         | D19S902 | 1.03   | 76.150  | .      |
| 19         | .       | .      | 77.380  | 0.86   |
| 19         | .       | .      | 79.380  | 0.80   |
| 19         | .       | .      | 81.380  | 0.72   |
| 19         | .       | .      | 83.380  | 0.63   |
| 19         | .       | .      | 85.380  | 0.51   |
| 19         | .       | .      | 87.380  | 0.40   |
| 19         | .       | .      | 89.380  | 0.29   |
| 19         | .       | .      | 91.380  | 0.20   |
| 19         | D19S571 | 0.07   | 93.012  | .      |
| 19         | .       | .      | 93.380  | 0.15   |
| 19         | .       | .      | 95.380  | 0.18   |
| 19         | .       | .      | 97.380  | 0.20   |
| 19         | .       | .      | 99.380  | 0.22   |
| 19         | .       | .      | 101.380 | 0.23   |
| 19         | .       | .      | 103.380 | 0.24   |
| 19         | D19S418 | 0.83   | 104.010 | .      |
| 19         | .       | .      | 105.380 | 0.27   |
| 19         | .       | .      | 107.380 | 0.27   |
| 19         | D19S210 | 0.05   | 108.595 | .      |
| 19         | .       | .      | 109.380 | 0.24   |
| 20         | D20S117 | 0.01   | 2.900   | 0.11   |
| 20         | .       | .      | 4.900   | 0.17   |
| 20         | .       | .      | 6.900   | 0.24   |
| 20         | .       | .      | 8.900   | 0.29   |
| 20         | .       | .      | 10.900  | 0.32   |
| 20         | D20S889 | 0.36   | 11.926  | .      |
| 20         | .       | .      | 12.900  | 0.35   |
| 20         | .       | .      | 14.900  | 0.41   |
| 20         | .       | .      | 16.900  | 0.45   |
| 20         | .       | .      | 18.900  | 0.47   |
| 20         | .       | .      | 20.900  | 0.45   |
| 20         | .       | .      | 22.900  | 0.42   |
| 20         | D20S115 | 0.30   | 24.660  | .      |
| 20         | .       | .      | 24.900  | 0.37   |
| 20         | .       | .      | 26.900  | 0.34   |
| 20         | .       | .      | 28.900  | 0.30   |
| 20         | .       | .      | 30.900  | 0.25   |
| 20         | .       | .      | 32.900  | 0.20   |

LOD\_sp: single-point linkage LOD score  
LOD\_mp: multi-point linkage LOD score

Supplementary Table 2 Single- and Multi-point non-parametric linkage findings (and marker positions) for major depressive disorder in the Australian NAG heavy smoking genomescan sample by chromosome

| Chromosome | Marker  | LOD_sp | POS(cM) | LOD_mp |
|------------|---------|--------|---------|--------|
| 20         | D20S186 | 0.13   | 34.580  | .      |
| 20         | .       | .      | 34.900  | 0.17   |
| 20         | .       | .      | 36.900  | 0.21   |
| 20         | .       | .      | 38.900  | 0.27   |
| 20         | .       | .      | 40.900  | 0.36   |
| 20         | .       | .      | 42.900  | 0.46   |
| 20         | D20S112 | 0.30   | 44.350  | .      |
| 20         | .       | .      | 44.900  | 0.53   |
| 20         | .       | .      | 46.900  | 0.52   |
| 20         | .       | .      | 48.900  | 0.50   |
| 20         | .       | .      | 50.900  | 0.48   |
| 20         | .       | .      | 52.900  | 0.46   |
| 20         | .       | .      | 54.900  | 0.44   |
| 20         | D20S195 | 0.16   | 56.358  | .      |
| 20         | .       | .      | 56.900  | 0.45   |
| 20         | .       | .      | 58.900  | 0.55   |
| 20         | .       | .      | 60.900  | 0.61   |
| 20         | D20S107 | 0.51   | 61.780  | .      |
| 20         | .       | .      | 62.900  | 0.64   |
| 20         | .       | .      | 64.900  | 0.65   |
| 20         | .       | .      | 66.900  | 0.63   |
| 20         | .       | .      | 68.900  | 0.58   |
| 20         | D20S119 | 0.23   | 69.400  | .      |
| 20         | .       | .      | 70.900  | 0.53   |
| 20         | .       | .      | 72.900  | 0.44   |
| 20         | D20S178 | 0.59   | 73.830  | .      |
| 20         | .       | .      | 74.900  | 0.29   |
| 20         | .       | .      | 76.900  | 0.11   |
| 20         | D20S196 | -0.02  | 78.470  | .      |
| 20         | .       | .      | 78.900  | 0.02   |
| 20         | .       | .      | 80.900  | 0.02   |
| 20         | .       | .      | 82.900  | 0.01   |
| 20         | .       | .      | 84.900  | 0.01   |
| 20         | .       | .      | 86.900  | 0.01   |
| 20         | .       | .      | 88.900  | 0.00   |
| 20         | D20S100 | 0.00   | 88.960  | .      |
| 20         | .       | .      | 90.900  | 0.00   |
| 20         | .       | .      | 92.900  | 0.00   |
| 20         | .       | .      | 94.900  | 0.00   |
| 20         | .       | .      | 96.900  | 0.00   |
| 20         | D20S171 | -0.04  | 98.630  | .      |
| 20         | .       | .      | 98.900  | 0.00   |
| 20         | .       | .      | 100.900 | 0.01   |
| 20         | D20S173 | 0.49   | 102.261 | .      |
| 20         | .       | .      | 102.900 | 0.03   |

LOD\_sp: single-point linkage LOD score

LOD\_mp: multi-point linkage LOD score

Supplementary Table 2 Single- and Multi-point non-parametric linkage findings (and marker positions) for major depressive disorder in the Australian NAG heavy smoking genomescan sample by chromosome

| Chromosome | Marker   | LOD_sp | POS(cM) | LOD_mp |
|------------|----------|--------|---------|--------|
| 21         | D21S1914 | 0.00   | 24.370  | -0.03  |
| 21         | .        | .      | 26.370  | -0.03  |
| 21         | .        | .      | 28.370  | -0.03  |
| 21         | .        | .      | 30.370  | -0.03  |
| 21         | .        | .      | 32.370  | -0.03  |
| 21         | D21S263  | -0.05  | 32.520  | .      |
| 21         | .        | .      | 34.370  | -0.03  |
| 21         | .        | .      | 36.370  | -0.02  |
| 21         | .        | .      | 38.370  | -0.01  |
| 21         | .        | .      | 40.370  | 0.00   |
| 21         | .        | .      | 42.370  | 0.00   |
| 21         | D21S1252 | 0.01   | 42.960  | .      |
| 21         | .        | .      | 44.370  | 0.00   |
| 21         | .        | .      | 46.370  | 0.00   |
| 21         | .        | .      | 48.370  | 0.00   |
| 21         | .        | .      | 50.370  | 0.00   |
| 21         | .        | .      | 52.370  | 0.00   |
| 21         | .        | .      | 54.370  | -0.01  |
| 21         | D21S266  | 0.02   | 56.000  | .      |
| 21         | .        | .      | 56.370  | -0.02  |
| 22         | D22S420  | 0.00   | 2.960   | 0.02   |
| 22         | .        | .      | 4.960   | 0.03   |
| 22         | .        | .      | 6.960   | 0.05   |
| 22         | .        | .      | 8.960   | 0.06   |
| 22         | .        | .      | 10.960  | 0.08   |
| 22         | .        | .      | 12.960  | 0.09   |
| 22         | D22S539  | -0.01  | 14.680  | .      |
| 22         | .        | .      | 14.960  | 0.11   |
| 22         | .        | .      | 16.960  | 0.21   |
| 22         | .        | .      | 18.960  | 0.35   |
| 22         | .        | .      | 20.960  | 0.50   |
| 22         | D22S315  | 1.12   | 22.590  | .      |
| 22         | .        | .      | 22.960  | 0.63   |
| 22         | .        | .      | 24.960  | 0.67   |
| 22         | .        | .      | 26.960  | 0.68   |
| 22         | .        | .      | 28.960  | 0.68   |
| 22         | .        | .      | 30.960  | 0.64   |
| 22         | .        | .      | 32.960  | 0.59   |
| 22         | .        | .      | 34.960  | 0.52   |
| 22         | .        | .      | 36.960  | 0.45   |
| 22         | D22S280  | 0.38   | 37.030  | .      |
| 22         | .        | .      | 38.960  | 0.53   |
| 22         | .        | .      | 40.960  | 0.56   |
| 22         | D22S283  | 0.34   | 42.071  | .      |
| 22         | .        | .      | 42.960  | 0.57   |

LOD\_sp: single-point linkage LOD score

LOD\_mp: multi-point linkage LOD score

Supplementary Table 2 Single- and Multi-point non-parametric linkage findings (and marker positions) for major depressive disorder in the Australian NAG heavy smoking genomescan sample by chromosome

| Chromosome | Marker  | LOD_sp | POS(cM) | LOD_mp |
|------------|---------|--------|---------|--------|
| 22         |         | .      | 44.960  | 0.57   |
| 22         |         | .      | 46.960  | 0.48   |
| 22         |         | .      | 48.960  | 0.35   |
| 22         | D22S423 | 0.52   | 49.140  | .      |
| 22         |         | .      | 50.960  | 0.24   |
| 22         |         | .      | 52.960  | 0.13   |
| 22         |         | .      | 54.960  | 0.05   |
| 22         | D22S274 | -0.01  | 56.470  | .      |
| 22         |         | .      | 56.960  | 0.02   |
